# Supplementary material for: TGF-β-induced MIR99AHG synergizes with PTBP1 to trigger a splicing switch of SMARCA1 that promotes invadopodia formation for metastasis in colorectal cancer
Source: Research Square preprint supplement (doi:10.21203/rs.3.rs-1538014/v2), 2022-12-20
Supplement: Supplementary file 1 [file 81d4d65fad98781533b82c39.pdf]

## **Supplemental Material**

### **MIR99AHG promotes invadopodia formation in colorectal cancer metastasis by tuning PTBP1-mediated splicing modulation of SMARCA1**

Danxiu Li, Xin Wang, Hui Miao, Hao Liu, Maogui Pang, Hao Guo, Minghui Ge, Xiaoni Ye, Sarah E. Glass, Stephan Emmrich, Jing Wang, Qi Liu, Taewan Kim, Jan-Henning Klusmann, Cunxi Li, Gang Ji, Yongzhan Nie, Kaichun Wu, Daiming Fan, Xu Song, Xin Wang, Ling Li, Yuanyuan Lu, Xiaodi Zhao

## Supplementary Materials and methods

### *Human TMA*

The study was approved by the Medical Ethics Committee of Xijing Hospital with written informed consent obtained from all patients. Human TMAs containing primary colorectal cancer (CRC) tissues with their adjacent normal tissues and matched lymph nodes or distant metastases were obtained from the CBSKL biobank and Outdo Biotech (Shanghai, China). The clinicopathological information of CRC patients is included in Supplementary Table 2. Serial sections of the TMA were used for *in situ* hybridization (ISH), RNAscope ISH and multispectral immunohistochemistry (IHC).

### *Animal studies*

All the animal experiments were conducted under protocols approved by the Institutional Animal Care and Use Committee at the Fourth Military Medical University. Six- to eight-week-old female athymic BALB/c nude mice were purchased from Beijing Vital River Laboratory Animal Technology. The mice were maintained under a 12-h light/dark cycle and on a standard chow diet at the specific-pathogen-free facility at the Experimental Animal Center of the Fourth Military Medical University. For the *in vivo* tumorigenesis assays, suspensions of stable luciferase-expressing CRC cells after the indicated treatment were subcutaneously injected into the posterior flanks of mice ( $5 \times 10^6$  tumor cells/150  $\mu$ l PBS per spot). Tumor volume was calculated using the following formula: tumor maximum diameter (L)  $\times$  the right-angle diameter to that axis (W)<sup>2</sup>/2. Three to four weeks after injection, the mice were sacrificed, and the tumors were paraffin-embedded for further examination. For *in vivo* metastasis assays, stable luciferase-expressing CRC cells after the indicated treatment were injected into nude mice via the tail vein ( $1.5 \times 10^6$  tumor cells/150  $\mu$ l PBS per mouse). The mice were subjected to bioluminescence detection using an IVIS 100 Imaging System (PerkinElmer) at weekly intervals. Four to five weeks after injection, the mice were sacrificed, and the lungs were paraffin-embedded for further examination.



## ***RNA-seq, small RNA-seq and data analysis***

Total RNA from cells was isolated by TRIzol Reagent (Invitrogen) and then purified using the RNeasy Mini Kit (Qiagen). The concentration and integrity of total RNA were estimated using a Qubit 2.0 Fluorometer (Invitrogen) and an Agilent 2100 Bioanalyzer (Agilent Technologies), respectively. RNA library construction and sequencing were performed as previously described [1]. Briefly, approximately 3 µg of total RNA from each sample was used for mRNA or small RNA library construction. For RNA-seq, the NEBNext DNA Library Prep Master Mix Set for Illumina (New England BioLabs) was used to prepare a next-generation sequencing expression library following the manufacturer's protocol. Accurate quantification for sequencing applications was determined using the qPCR-based KAPA Biosystems Library Quantification Kit (Kapa Biosystems). Paired-end sequencing (75 bp) was performed on a NextSeq 500 sequencer (Illumina). RNA-Seq reads were aligned to the human genome hg19 using TopHat2, and the number of reads mapped to each gene was calculated by HTseq. For small RNA-seq, the NEBNext Small RNA Library Prep Set for Illumina (New England BioLabs) was used to prepare a small RNA library following the manufacturer's protocol. Accurate quantification for sequencing applications was performed using the qPCR-based KAPA Biosystems Library Quantification Kit. Single-end sequencing (50 bp) was performed on a NextSeq 500 Sequencer. Reads were aligned to the human genome hg19 using Bowtie. Mapped reads were annotated, and miRNA expression was quantified using ncPRO-seq (version v1.5.1) based on miRbase v19. Differentially expressed genes (DEGs), lncRNAs and miRNAs were detected by edgeR based on a negative binomial distribution. The online Database For Annotation, Visualization, Integrated Discovery (DAVID) was used to perform gene ontology (GO) and Kyoto Encyclopedia of Genes and Genomes (KEGG) pathway analysis to analyze the biological characteristics and functional annotations of the candidate DEGs [2]. Gene set enrichment analysis (GSEA) was used to determine whether DEGs were related to one phenotype or signaling pathway using GSEA software [3]. ASprofile (<https://ccb.jhu.edu/>) was

employed to classify alternative splicing (AS) events, and differential AS events were identified by rMATS [4].

#### ***Constructs, oligonucleotides and cell transfection***

Expression vectors encoding the full-length, truncated and antisense MIR99AHG were constructed by subcloning the corresponding sequences into a pZW1-snoVector. The pZW1-snoVector was kindly provided by Dr. Ling-Ling Chen (Center for Excellence in Molecular Cell Science, Chinese Academy of Sciences). Expression vectors encoding PTBP1 (full-length or truncation), SMARCA1-L and SMARCA1-S were constructed by subcloning the corresponding ORF regions into a pcDNA3.1 vector. The SMARCA1 minigene was constructed by subcloning the sequence region from exon 12 to exon 14 of SMARCA1 into a pcDNA3.1 vector. To establish MIR99AHG stably transfected cells, the MIR99AHG sequence was subcloned into a pLVX-IRES-Puro vector. Cells stably expressing MIR99AHG were established by lentivirus infection and selected with puromycin. Antisense oligonucleotides (ASOs) targeting MIR99AHG were purchased from RiboBio. siRNAs targeting TKS5, Cortactin, PTBP1 and U2AF2 were purchased from GenePharma. Isoform-specific siRNAs targeting SMARCA1-L and SMARCA1-S were purchased from Tsingke. The sequence information of the siRNAs used in this study is listed in Supplementary Table 3. Plasmids and oligonucleotides were transfected into the target cells using JetPRIME (Polyplus Transfection) reagent following the manufacturer's instructions.

#### ***Generation of CRISPR/Cas9 knockout cell lines***

Two pairs of guide RNAs (gRNAs) targeting the start and end sequences of MIR99AHG exon 8 and two gRNAs targeting the sequences of *SMARCA1* exon 1 were designed using the CRISPRdirect web server (<https://crispr.dbcls.jp>). Target sequences of gRNAs are listed in Supplementary Table 4. Human codon-optimized Cas9 (hCas9) and GFP-targeting gRNA-expressing plasmid (gRNA\_GFP-T1) were purchased from Addgene. The GFP-targeting sequence

1 in gRNA\_GFP-T1 was replaced using QuickChange site-directed mutagenesis. To construct the  
2 knockout cell lines, the modified gRNA\_GFP-T1, hCas9 and pEGFP-C1 vectors were  
3 cotransfected into KM12SM or DLD-1 cells. GFP-positive cells were identified by flow cytometry  
4 and sorted into single clones in a 96-well plate. Single clones were screened by the T7 endonuclease  
5 I-cutting assay. The knockout clones were confirmed by DNA sequencing.

### 7 ***Transwell migration and invasion assay***

8 For the migration assays, 24-well Transwell plates with 8- $\mu$ m-diameter micropore membranes  
9 without Matrigel (Millipore) were used. Invasion assays were conducted using 8- $\mu$ m pore, 24-well  
10 Transwell plates with Matrigel (Corning). A total of  $2 \times 10^5$  cells resuspended in serum-free medium  
11 were seeded into the upper compartment of the migration or invasion chambers, and the bottom  
12 chamber was filled with culture medium with 20% FBS as an attractant. After incubation in 5%  
13 CO<sub>2</sub> at 37°C for 16-48 h, cells that had migrated or invaded through the membrane were fixed with  
14 75% ethanol, stained with crystal violet dye and then counted under a microscope (Olympus) to  
15 determine cell numbers. All assays were conducted in triplicate, and three fields of an insert were  
16 randomly chosen for quantification.

### 18 ***Wound healing assay***

19 CRC cells with the indicated treatments were suspended at a concentration of  $3-7 \times 10^5$  cells/ml, and  
20 70  $\mu$ l of the cell suspension was added to each well of a Culture-Insert 2 Well plate (Ibidi). After  
21 appropriate cell attachment, the well was gently removed, and a scratch was made across the cell  
22 monolayer. The wounded cells were cultured with serum-free culture medium and imaged at  
23 different time points after scratching.

### 25 ***ISH***

1 Detection of MIR99AHG expression alone in CRC cells and TMAs was measured by using an ISH  
2 optimization kit (Roche) according to the manufacturer's instructions. The locked nucleic acid  
3 (LNA)-modified oligonucleotide probe targeting MIR99AHG was purchased from Exiqon. For  
4 pretreatment, CRC cells seeded on a Lab-Tek chamber slide (Nunc) were fixed in prechilled 4%  
5 paraformaldehyde (PFA) at 4°C for 15 min, and the TMA sections were deparaffinized with xylene,  
6 followed by rehydration in serial dilutions of ethanol. After washing three times, the sections were  
7 incubated in proteinase K for 20 min. The sections were reconstituted using hybridization solution  
8 and incubated with the digoxigenin-labeled MIR99AHG probe at 56°C overnight. After washing,  
9 the sections were blocked with 5% normal goat serum at room temperature (RT) for 1 h followed  
10 by incubation in an anti-digoxigenin alkaline phosphatase conjugate (Roche) at 4°C overnight.  
11 Colorimetric signals were obtained by incubating the sections with NBT/BCIP buffer (Roche) in  
12 the dark at RT for 4 h. Nuclear fast red was used as the counterstain.

13 Detection of SMARCA1-L expression in the TMAs or the colocalization of MIR99AHG and  
14 SMARCA1 pre-mRNA in CRC cells was measured by using the RNAscope Multiplex Fluorescent  
15 Kit v2 (Advanced Cell Diagnostics) according to the manufacturer's instructions. The probes for  
16 MIR99AHG, SMARCA1 pre-mRNA and SMARCA1-L were designed by Advanced Cell  
17 Diagnostics. Briefly, pretreated sections were incubated in RNAscope probe mixture at 40°C for 2  
18 h to hybridize the probes. The sections were incubated in the detection reagents for AMP signal  
19 amplification in the following order: AMP 1 for 30 min, AMP 2 for 30 min and AMP 3 for 15 min.  
20 Horseradish peroxidase (HRP) was linked to probe channels (C1 for MIR99AHG and C2 for  
21 SMARCA1-L). HRP-C1 or HRP-C2 (4-6 drops) was added to entirely cover each slide at 40°C for  
22 15 min. Fluorescent tyramide signal amplification was used to develop the signal. Finally, sections  
23 were counterstained with DAPI and cover slipped with ProLong Gold (Thermo Fisher Scientific).  
24 Confocal images were acquired with an Olympus FV3000 inverted confocal microscope.

25  
26 ***IHC***

1 Paraffin-embedded specimens were sectioned, deparaffinized and treated with 3% H<sub>2</sub>O<sub>2</sub> to block  
2 endogenous peroxidase activity. Slides were immersed in antigen retrieval buffer, heated to 120°C  
3 for 20 min and then allowed to cool to RT. Incubation of primary antibody was performed at 4°C  
4 overnight, and secondary antibody was incubated at RT for 1 h, followed by visualization with  
5 diaminobenzidine and image acquisition with a light microscope. Ki-67 staining was quantified by  
6 calculating positively stained cells in five randomly chosen fields of each sample. For multispectral  
7 staining, the TMA was baked at 62°C for 3 h, and subsequent deparaffinization was performed on  
8 a Leica Bond RX followed by four sequential cycles of staining, with each round including a 30  
9 min combined block and primary antibody incubation. Detection of the primary antibodies was  
10 performed by applying a secondary HRP-conjugated polymer (Perkin Elmer) for 10 min. The HRP-  
11 conjugated secondary antibody polymer was detected using fluorescent tyramide signal  
12 amplification using Opal dyes 540, 570, 650 and 690 (Perkin Elmer). The covalent tyramide  
13 reaction was followed by heat-induced stripping of the primary/secondary antibody complex using  
14 Perkin Elmer AR9 buffer at 100°C for 20 min preceding the next cycle. After four sequential rounds  
15 of staining, the sections were stained with DAPI to visualize the nuclei and mounted with Prolong  
16 Gold antifade reagent mounting medium (Invitrogen).

### 17 ***Quantification of ISH and IHC signals***

19 The results of ISH and multispectral IHC were scored by two independent observers. Expression  
20 was visualized and classified based on the intensity of staining and the percentage of positive cells.  
21 The intensity score was divided into four grades: 0, no staining; 1, weak staining; 2, moderate  
22 staining; and 3, strong staining. The percentage score was also divided into four grades: 0, ≤1%; 1,  
23 2%-25%; 2, 26%-50%; 3, 51%-75%; and 4 ≥75%. The histological score (H-score) was calculated  
24 by multiplying the intensity score by the percentage score. Overall scores of 0-12 were classified  
25 as negative (score: 0), weak (score: 1-4), moderate (score: 5-8) or strong (score: 9-12).

### ***Cell viability measurement***

CRC cells with the indicated treatments were seeded in a 96-well plate and allowed to adhere to the wells. At each time point, the culture medium was replaced with Cell Counting Kit-8 solution (Dojindo), and then the cells were incubated at 37°C for 2 h. The absorbance values were read at 450 nm using a Thermo Scientific Varioskan Flash multimode reader.

### ***Cell cycle and apoptosis analysis***

For cell cycle analysis, CRC cells with the indicated treatments were serum starved for 12 h to induce cell cycle synchronization. The cells were harvested, resuspended and fixed in 70% ethanol at 4°C for 24 h and stained with propidium iodide (PI, Sigma-Aldrich). For apoptosis analysis, CRC cells with the indicated treatments were harvested, resuspended in staining buffer and examined using the Annexin V-FITC Early Apoptosis Detection Kit (BD Biosciences). Cells positive for Annexin V-FITC and negative for PI were considered to have undergone apoptosis. Cell cycle and apoptosis were analyzed using a fluorescence-activated cell sorter (BD Biosciences), and the data were analyzed using EXPO32 ADC software.

### ***Colony formation assay***

CRC cells with the indicated treatments were seeded in 6-well plates at a density of  $1 \times 10^3$  cells per well. After 2 weeks of incubation, the colonies were fixed with 75% ethanol and stained with crystal violet dye. The colonies in all wells were counted with a GelCount colony counter (Oxford Optronix), and each group had three replicates.

### ***RT-PCR and RT-qPCR***

Total RNA was extracted from cells using TRIzol reagent (Invitrogen). cDNA synthesis was carried out using the PrimeScript RT Reagent Kit (TaKaRa). RT-PCR was performed using KOD-Plus-Neo DNA polymerase (Toyobo). Reaction products were analyzed on 1-2% agarose gels with

ethidium bromide staining. qPCR was performed using the SYBR Premix Ex Taq Kit (TaKaRa). Fluorescence was measured, and CT values were calculated using a CFX96 Real-Time PCR Detection System (Bio-Rad). Primers for miRNAs were purchased from RiboBio. Other primers are described in Supplementary Table 3.

### ***Immunofluorescence***

CRC cells with the indicated treatment were seeded on a Lab-Tek chamber slide (Nunc) and fixed in 4% PFA for 20 min. The cells were permeabilized using 0.1% Triton X-100 in PBS for 15 min and blocked with 2% BSA in PBS for 30 min. Incubation of primary antibodies was performed at 4°C overnight, and secondary antibodies were incubated at RT for 1 h. The nuclei were stained with DAPI, and fluorescence images were taken on a Nikon A1 Confocal Laser Microscope System.

### ***Electron microscopy***

For transmission electron microscopy analysis, CRC cells after the indicated treatment were collected by trypsinization and prefixed in a mixture of 2.5% glutaraldehyde and 4% PFA at 4°C overnight and washed with phosphate buffer. Then, the cells were dehydrated using a graded ethanol immersion series and embedded in resin. Cross-sections (800 nm thick) were cut, stained with toluidine blue and observed to identify areas with cytoplasmic inclusions. Ultrathin sections (90 nm) were prepared, stained with uranyl acetate and lead citrate, and examined under a transmission electron microscope (Tecnai G2 Spirit, FEI company). For scanning electron microscopy analysis, CRC cells after the indicated treatment were prefixed with 2.5% glutaraldehyde in 0.1 M sodium cacodylate buffer for 30 min. The cells were washed with cacodylate buffer, dehydrated through a graded series of ethanol, and dried with hexamethyldisilazane. The samples were then mounted on aluminum stubs and coated with gold/palladium. The cells were examined under a scanning electron microscope (S-4800, Hitachi).

### ***Protein extraction and immunoblotting***

Proteins were extracted from cultured cells or concentrated FBS-free media using RIPA buffer (Beyotime) supplemented with protease and phosphatase inhibitors (Roche) and boiled with SDS loading buffer for 10 min. The denatured proteins were separated on a 6-12% SDS-PAGE gel for immunoblotting analysis with the indicated antibodies listed in Supplementary Table 5. The blotted bands were visualized by the Bio-Rad ChemiDoc XRS+ imaging system.

### ***RNA pulldown***

To synthesize biotin-labeled transcripts of MIR99AHG, PCR fragments were prepared using forward primers harboring the T7 RNA polymerase promoter. Following purification of the PCR products, biotinylated transcripts were synthesized using the MaxiScript T7 Kit (Ambion). Biotinylated RNA (1 µg) was first folded in RNA structure buffer (0.1 M KCl, 10 mM MgCl<sub>2</sub> and 10 mM Tris-HCl, pH 7.0) and then incubated with cell lysates at 25°C for 3 h with rotation. After incubation, RNA-protein complexes were isolated with streptavidin-coupled Dynabeads (Invitrogen). The retrieved RNA-associated proteins were fractionated by SDS-PAGE and visualized by silver staining. Protein bands present only in specific RNA samples were excised and identified by mass spectrometry. The retrieved protein samples were confirmed by immunoblotting.

### ***Immunoprecipitation***

Cells were lysed in RIPA buffer containing protease inhibitor cocktail. Protein samples with or without nuclease treatment were incubated with a specific antibody or control IgG at 4°C overnight. Subsequently, the samples were incubated with 50 µl of protein G magnetic beads (Thermo Fisher Scientific) at 4°C for 1 h and then washed five times in lysis buffer. Protein complexes were eluted with SDS buffer and then detected by immunoblotting.

### ***RIP***



For native RIP assays, RNase OUT (Invitrogen) and a protease inhibitor cocktail were added to RIPA buffer. After incubation with a specific antibody or control IgG at 4°C overnight, the cell lysates were incubated with 50 µl of protein G magnetic beads at 4°C for 1 h and then washed three times in lysis buffer. The beads were resuspended and treated with proteinase K at 45°C for 45 min. Coprecipitated RNAs were extracted using TRIzol reagent, ethanol-precipitated with Glycoblue (Invitrogen) as a carrier and then detected by RT-qPCR. The retrieved RNA data are presented as a percentage of the amount input. For RIP-based mapping assays, lysates were first mixed with RNase T1 (Thermo Fisher Scientific), after which standard native RIP assays were performed using an antibody against PTBP1. Following extraction of the coprecipitated RNA, the MIR99AHG segments bound by PTBP1, and hence protected from RNase T1 digestion and immunoprecipitated, were identified by RT-qPCR analysis using primer sets that scanned the MIR99AHG transcript at ~150-nt-long, overlapping intervals. The PCR primers used are listed in Supplementary Table 3.

#### ***ChIRP***

A total of  $6 \times 10^7$  cells were cross-linked by 1% glutaraldehyde at RT for 10 min, followed by three washes in cold PBS. After being snap-frozen in liquid nitrogen and stored at -80°C, crosslinked cells were resuspended in nuclear lysis buffer (10 mM EDTA, 1% SDS and 50 mM Tris-HCl, pH 7.5) supplemented with a protease inhibitor cocktail and sonicated until DNA was in the size range of 100-500 bp. Cell lysates and a set of biotin-labeled antisense probes (20 nt in length) were then incubated at 37°C for 4 h. Briefly, 18 probes unique to the MIR99AHG sequence and spanning the entire transcript were designed using the online designer at Stellaris (<http://www.singlemoleculefish.com>). Three probes were designed against LacZ RNA as a negative control. Probes were labeled according to their positions along the RNA and separated into two pools so that the “even” pool contained all probes numbering 2, 4, 6, etc. and the “odd” pool contained probes numbering 1, 3, 5, etc. Experiments were performed using both pools, which served as internal controls for each other. Streptavidin-coupled Dynabeads were added to pull down

1 the probes. After washing, the retrieved DNA was isolated using the ChIP DNA Clean &  
2 Concentrator Kit (Zymo Research) and subjected to qPCR analysis. The probes used for ChIRP are  
3 shown in Supplementary Table 3.

#### 5 ***RAP***

6 Cells were suspended in PBS at a concentration of  $2 \times 10^7$  cells/ml in 6-well cell culture plates and  
7 incubated on ice for 15 min. The cells were irradiated for 15 min with 365-nm UV light, followed  
8 by RNA isolation using TRIzol reagent. To pull down the target RNAs, 15 pM biotin-labeled  
9 antisense probes (90 nt in length) were denatured at 85°C for 3 min and then transferred  
10 immediately on ice. Then, probes and 2 µg RNA were mixed in LiCl hybridization buffer (1 mM  
11 EDTA, 500 mM LiCl, 1% Triton X-100, 0.2% SDS, 0.1 sodium deoxycholate and 10 mM Tris-  
12 HCl, pH 7.5) and transferred to a 55°C thermomixer with shaking at 1,200 rpm for 2 h. Then, 200  
13 µl streptavidin-coupled Dynabeads were added and incubated at RT for 2 h. After washing, the  
14 retrieved RNAs were extracted by TRIzol reagent and subjected to RT-qPCR analysis. The probes  
15 used for RAP are shown in Supplementary Table 3.

#### 17 ***Statistics***

18 Statistical analysis was performed by SPSS 18.0 and R (version 3.3.1). The statistical significance  
19 of differences between datasets was evaluated according to p values, and a  $p < 0.05$  was considered  
20 to indicate statistical significance. The mean  $\pm$  SEM ( $n = 3$ ) of a representative of 3 triplicate  
21 experiments are shown. Two-tailed Student's t test, ANOVA with Dunnett's multiple comparison,  
22 nonparametric signed rank test, Chi-square test and Pearson correlation coefficients were used  
23 according to the type of experiment, and the test type is indicated in the figure legends.

## Reference

1. Lu Y, Zhao X, Liu Q, Li C, Graves-Deal R, Cao Z, Singh B, Franklin JL, Wang J, Hu H, et al: **lncRNA MIR100HG-derived miR-100 and miR-125b mediate cetuximab resistance via Wnt/beta-catenin signaling.** *Nat Med* 2017, **23**:1331-1341.
2. Dennis G, Jr., Sherman BT, Hosack DA, Yang J, Gao W, Lane HC, Lempicki RA: **DAVID: Database for Annotation, Visualization, and Integrated Discovery.** *Genome Biol* 2003, **4**:P3.
3. Subramanian A, Tamayo P, Mootha VK, Mukherjee S, Ebert BL, Gillette MA, Paulovich A, Pomeroy SL, Golub TR, Lander ES, Mesirov JP: **Gene set enrichment analysis: a knowledge-based approach for interpreting genome-wide expression profiles.** *Proc Natl Acad Sci U S A* 2005, **102**:15545-15550.
4. Shen S, Park JW, Lu ZX, Lin L, Henry MD, Wu YN, Zhou Q, Xing Y: **rMATS: robust and flexible detection of differential alternative splicing from replicate RNA-Seq data.** *Proc Natl Acad Sci U S A* 2014, **111**:E5593-5601.

**Figure S1**

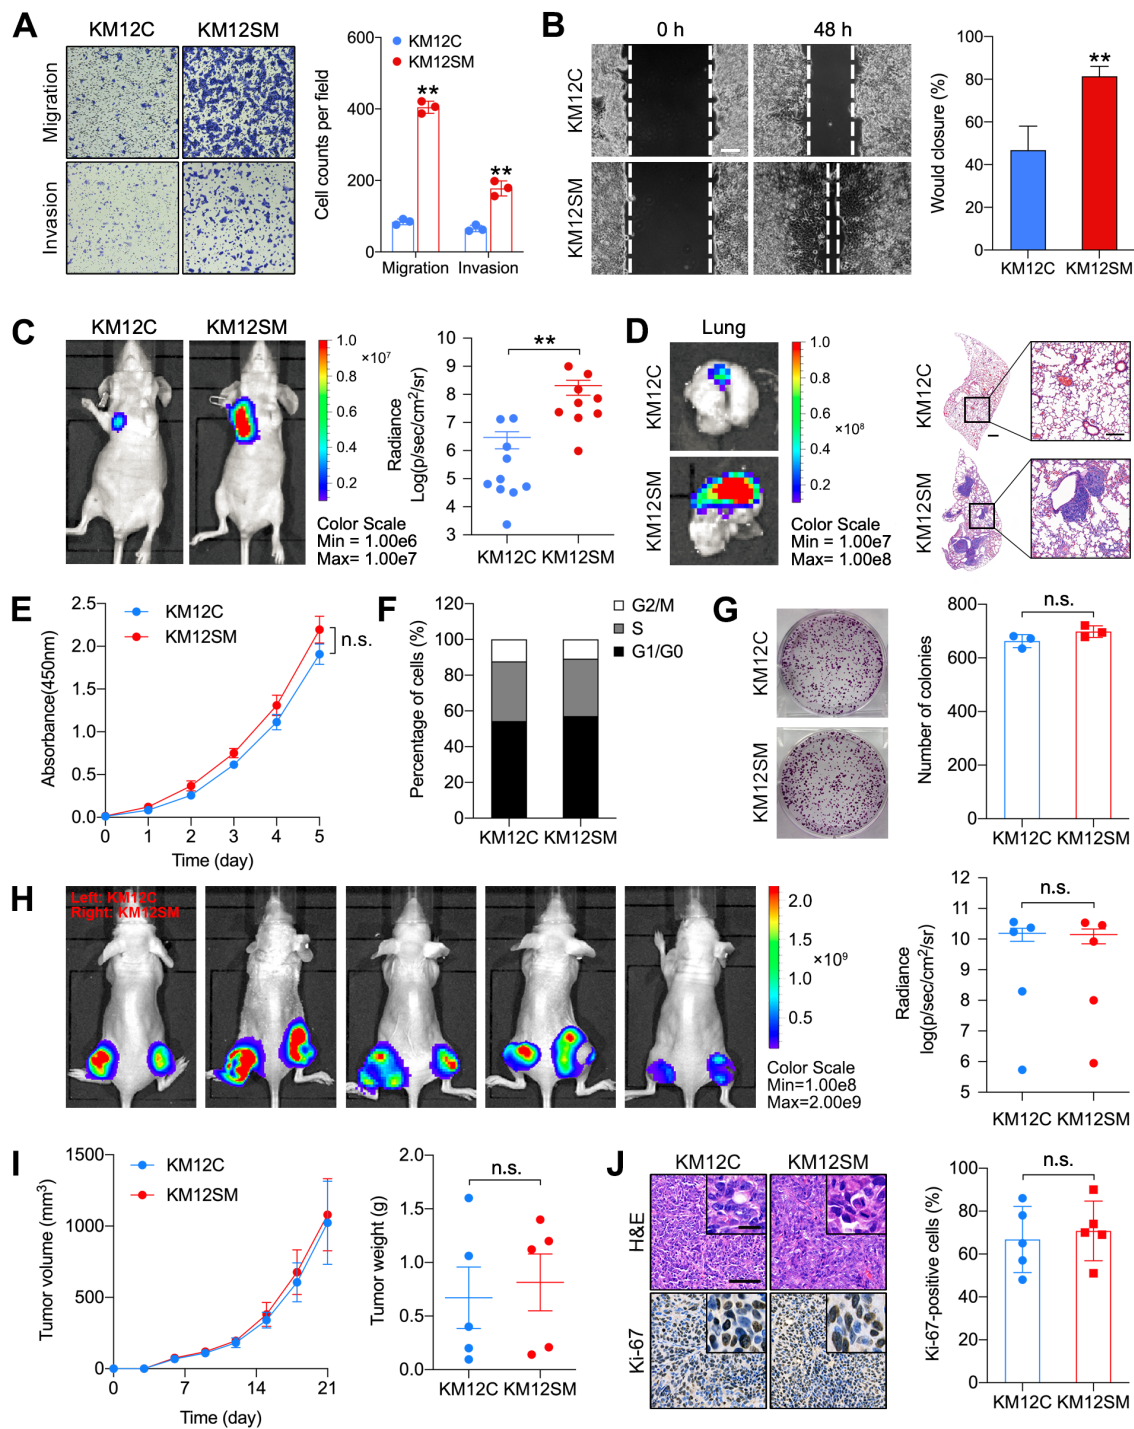

**Figure S1. KM12SM and KM12C exhibited different capacities in metastasis but not in proliferation**

**(A)** Migration and invasion of KM12C and KM12SM cells. Representative images are shown on the left, and the quantification results for three randomly selected fields are shown on the right. \*\*  $P < 0.01$  by Student's  $t$  test.

**(B)** Wound healing assays of KM12C and KM12SM cells. Representative images are shown on the left, and the percentage of wound closure normalized to 0 h in three randomly selected fields is shown on the right. Scale bar, 200  $\mu\text{m}$ . \*\*  $P < 0.01$  by Student's  $t$  test.

**(C, D)** Representative bioluminescence images of metastases in nude mice (n=10 mice per group) after tail vein injection of KM12C and KM12SM cells are shown in (C). The radiance values of lung metastases from the indicated groups are shown. Representative bioluminescence images and hematoxylin and eosin (H&E) staining of lung metastatic nodules from the indicated groups are shown in (D). Scale bars: main, 500  $\mu\text{m}$ ; inset, 200  $\mu\text{m}$ . \*\*  $P < 0.01$  by Student's  $t$  test.

**(E-G)** Growth curves (E), cell cycle analyses (F) and colony formation assays (G) in KM12C and KM12SM cells.

**(H-J)** Bioluminescence image of tumors in nude mice after subcutaneous injection of KM12C and KM12SM cells (n = 5 mice), and the radiance values of tumors from the indicated groups are shown (H). Quantification of growth curves and tumor weights from the indicated groups are shown (I). Xenograft tumors were stained with H&E and Ki-67, and the percentage of Ki-67-positive cells was measured (J). Scale bars: main, 100  $\mu\text{m}$ ; inset, 20  $\mu\text{m}$ .

# Figure S2

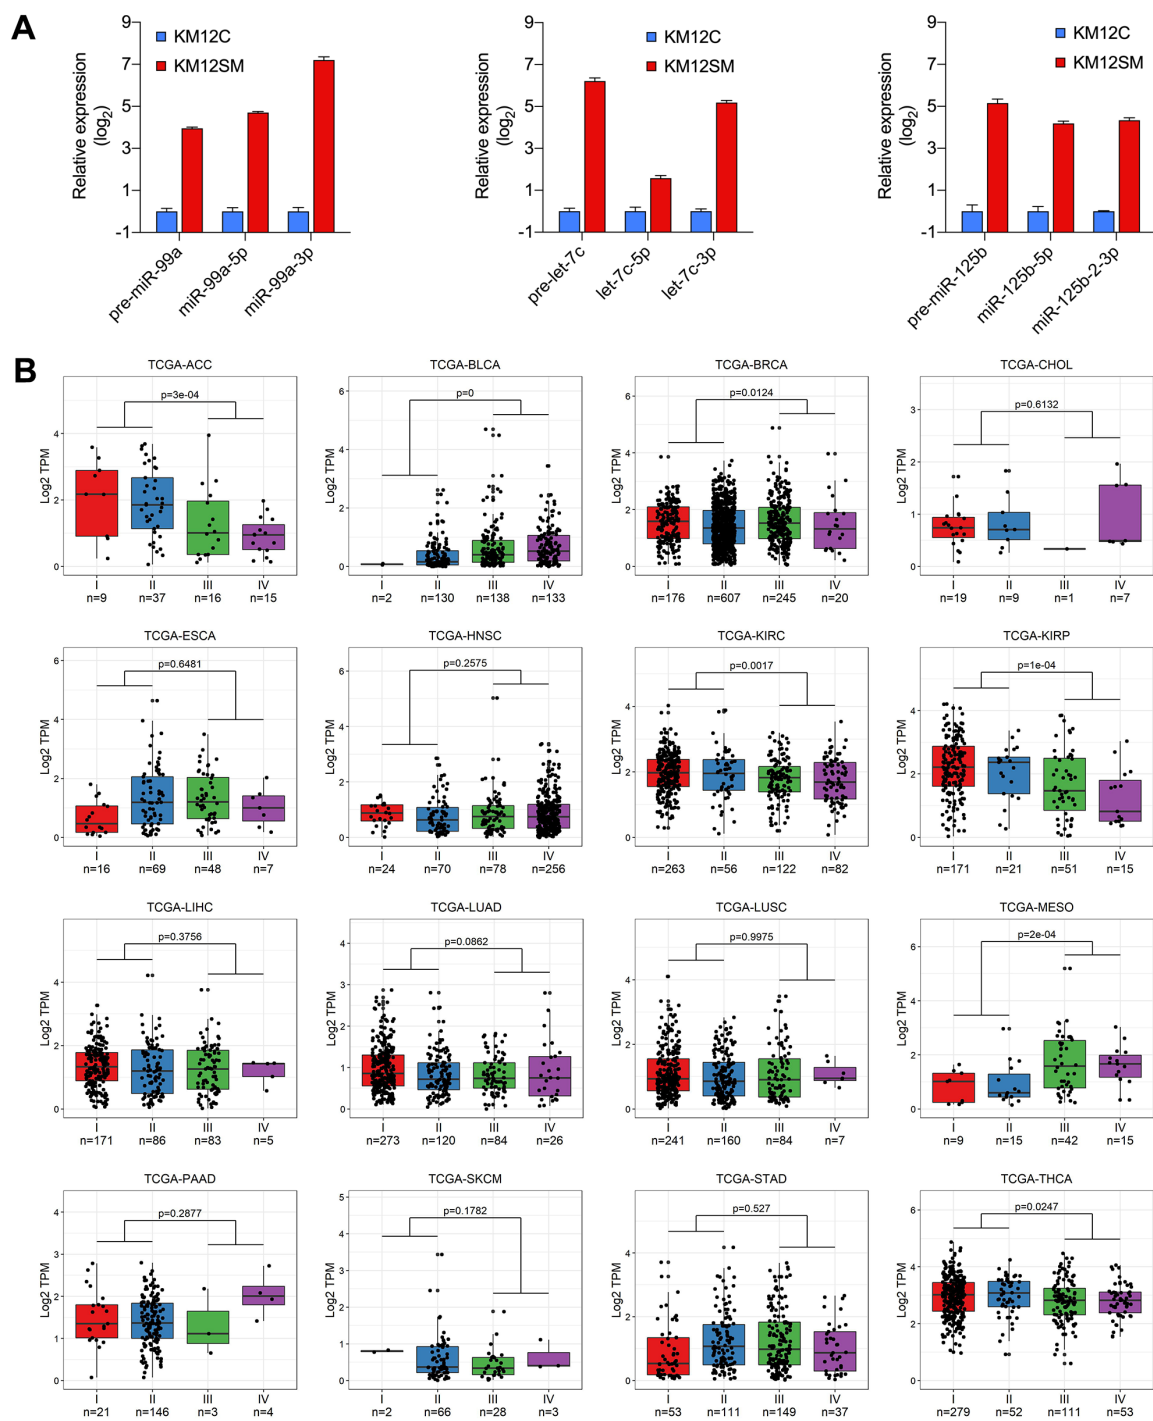

1 **Figure S2. Expression of MIR99AHG-derived miRNAs and MIR99AHG in CRC cells and**  
2 **other cancer types**

3 **(A)** RT-qPCR of primary and mature transcripts of miR-125b, let-7c and miR-99a in KM12C and  
4 KM12SM cells. U6 snRNA served as the internal control. \*\*  $P < 0.01$  by Student's *t* test.

5 **(B)** Box plots showing the expression pattern of MIR99AHG by stage from the TCGA data  
6 repository. Statistical significance was determined by the Mann-Whitney U test. ACC,  
7 adrenocortical carcinoma; BLCA, bladder urothelial carcinoma; BRCA, breast invasive carcinoma;  
8 cholangiocarcinoma; ESCA, esophageal carcinoma; HNSC, head-neck squamous cell carcinoma;  
9 KIRC, kidney renal clear cell carcinoma; KIRP, kidney renal papillary cell carcinoma; LIHC, liver  
10 hepatocellular carcinoma; LUAD, lung adenocarcinoma; LUSC, lung squamous cell carcinoma;  
11 MESO, mesothelioma; PAAD, pancreatic adenocarcinoma; SKCM, skin cutaneous melanoma;  
12 STAD, stomach adenocarcinoma; THCA, thyroid carcinoma.



Figure S3

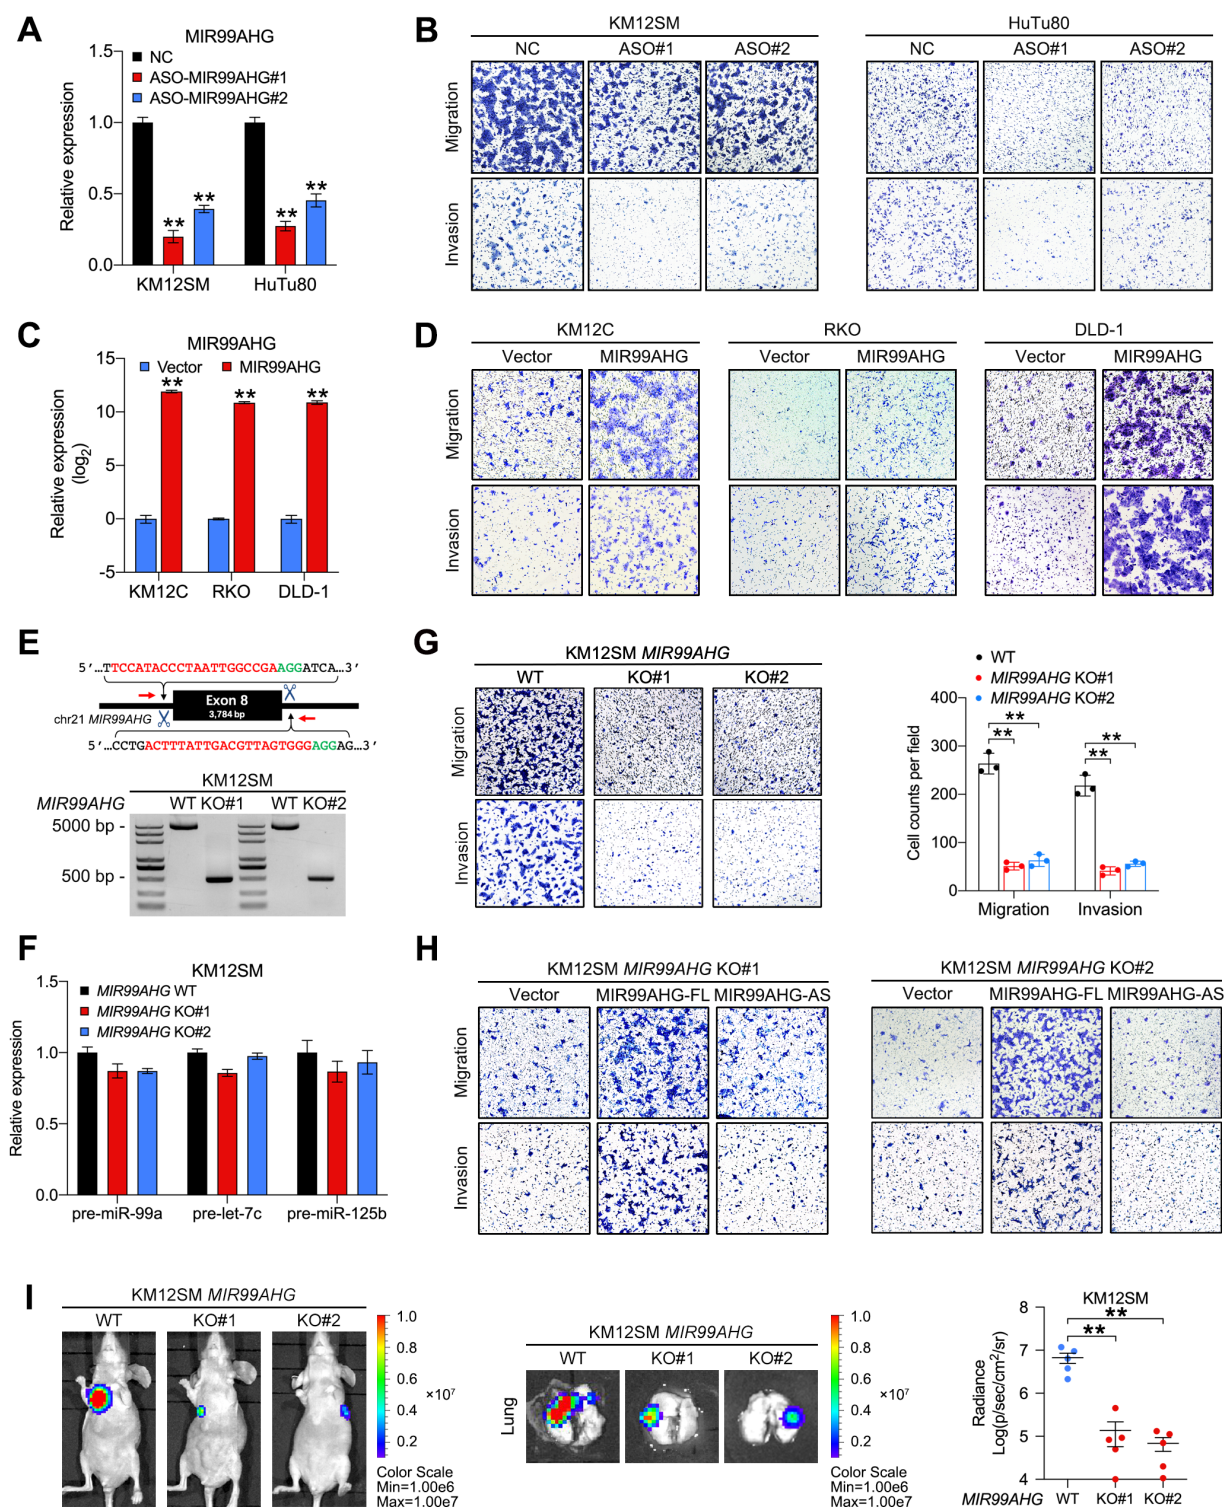



**Figure S3. MIR99AHG promotes migration, invasion and metastasis in CRC cells**

**(A)** RT-qPCR analysis of MIR99AHG expression in KM12SM and HuTu80 cells transfected with ASOs against MIR99AHG or a negative control.

**(B)** Representative images of Transwell migration and invasion assays in Figure 2A.

**(C)** RT-qPCR analysis of MIR99AHG expression in KM12C, RKO and DLD-1 cells transfected with a MIR99AHG construct or a control vector.

**(D)** Representative images of Transwell migration and invasion assays in Figure 2B.

**(E)** Top, schematic illustration of the targeting strategy to delete exon 8 in *MIR99AHG*. Sequences targeted by CRISPR/Cas9 are shown in red. Protospacer adjacent motifs are shown in green. Red arrows indicate PCR primers used for sequencing. Bottom, representative agarose gel displaying PCR products of primers flanking exon 8 of MIR99AHG using genomic DNA isolated from wild-type and two clones of *MIR99AHG*<sup>KO</sup> KM12SM cells.

**(F)** RT-qPCR analysis of the expression of MIR99AHG and the miR-99a/let-7c/miR-125b-2 cluster in WT and *MIR99AHG*<sup>KO</sup> KM12SM cells.

**(G)** Transwell migration and invasion assays of WT and *MIR99AHG*<sup>KO</sup> KM12SM cells. \*\* P < 0.01 by one-way ANOVA (Dunnett's test).

**(H)** Representative images of Transwell migration and invasion assays in Figure 2C.

**(I)** Representative bioluminescence images of metastases in whole mice and lungs after tail vein injection of WT or *MIR99AHG*<sup>KO</sup> KM12SM cells (n = 5 mice per group). The radiance values of lung metastatic nodules from the indicated groups are shown. \*\* P < 0.01 by one-way ANOVA (Dunnett's test).

# Figure S4

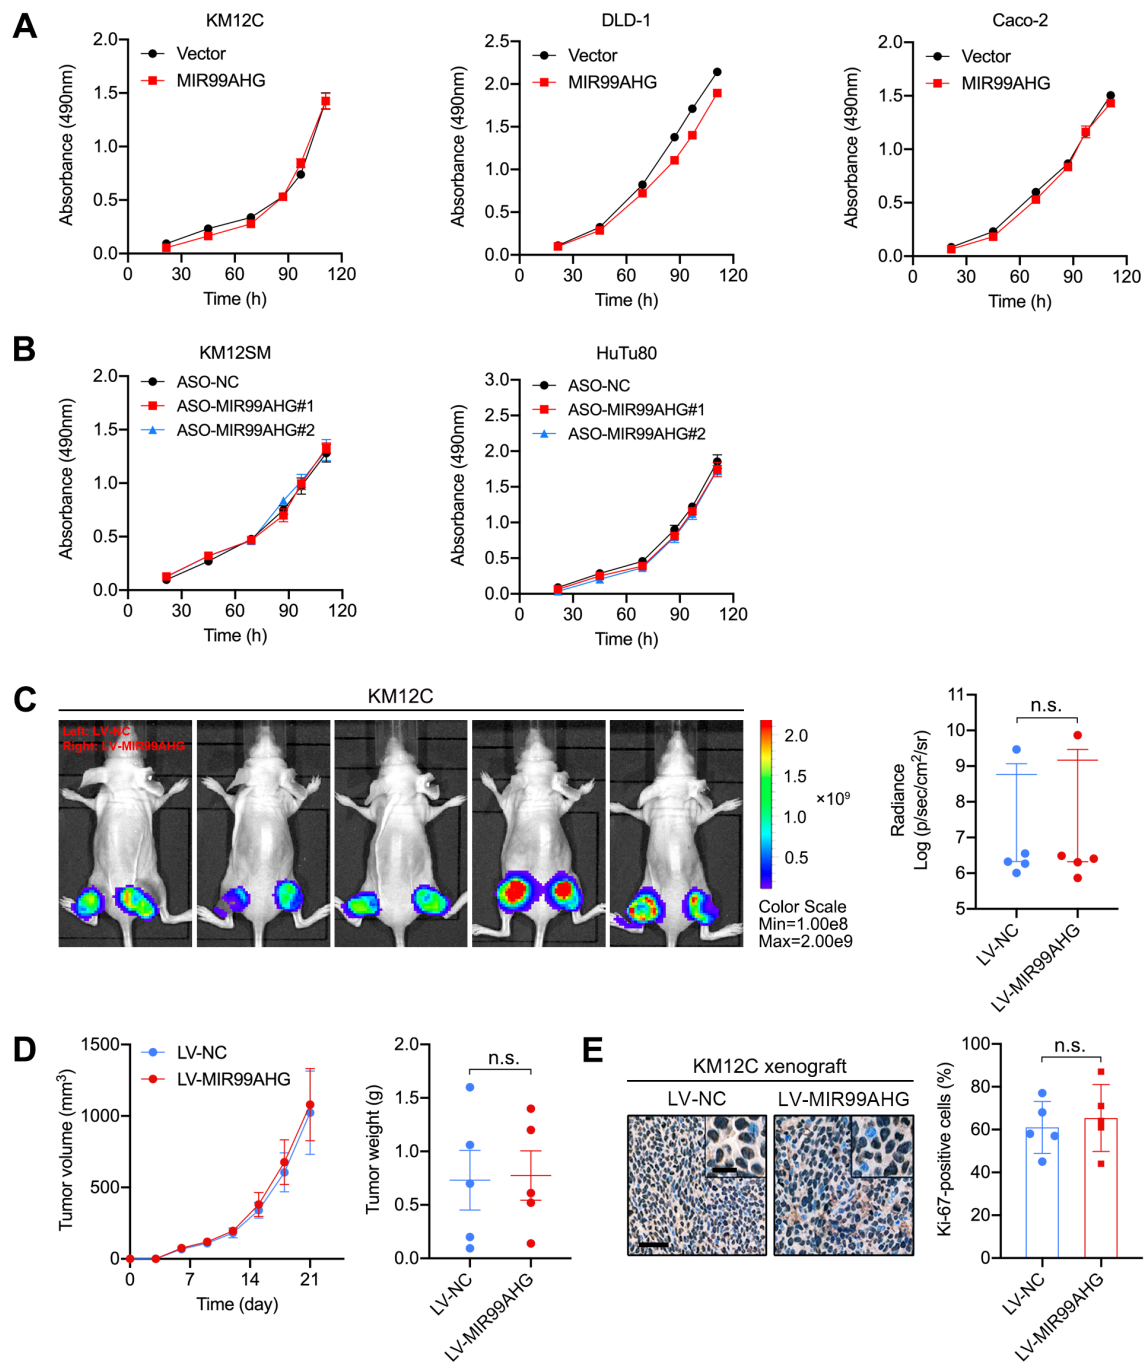

**Figure S4. MIR99AHG has no effect on proliferation and tumor growth in CRC cells**

**(A)** Growth curves of KM12C, DLD-1 and Caco-2 cells transfected with plasmids expressing MIR99AHG or a control vector.

**(B)** Growth curves of KM12SM and HuTu80 cells transfected with ASOs against MIR99AHG or a negative control.

**(C-E)** Bioluminescence image of tumors in nude mice after subcutaneous injection of KM12C cells stably expressing MIR99AHG or control vector. The radiance values of tumors from the indicated groups are shown (C). Quantification of growth curves and tumor weights from the indicated groups are shown (D). Xenograft tumors were stained with Ki-67, and the percentage of Ki-67-positive cells was measured (E). Scale bars: main, 100  $\mu\text{m}$ ; inset, 20  $\mu\text{m}$ .

# Figure S5

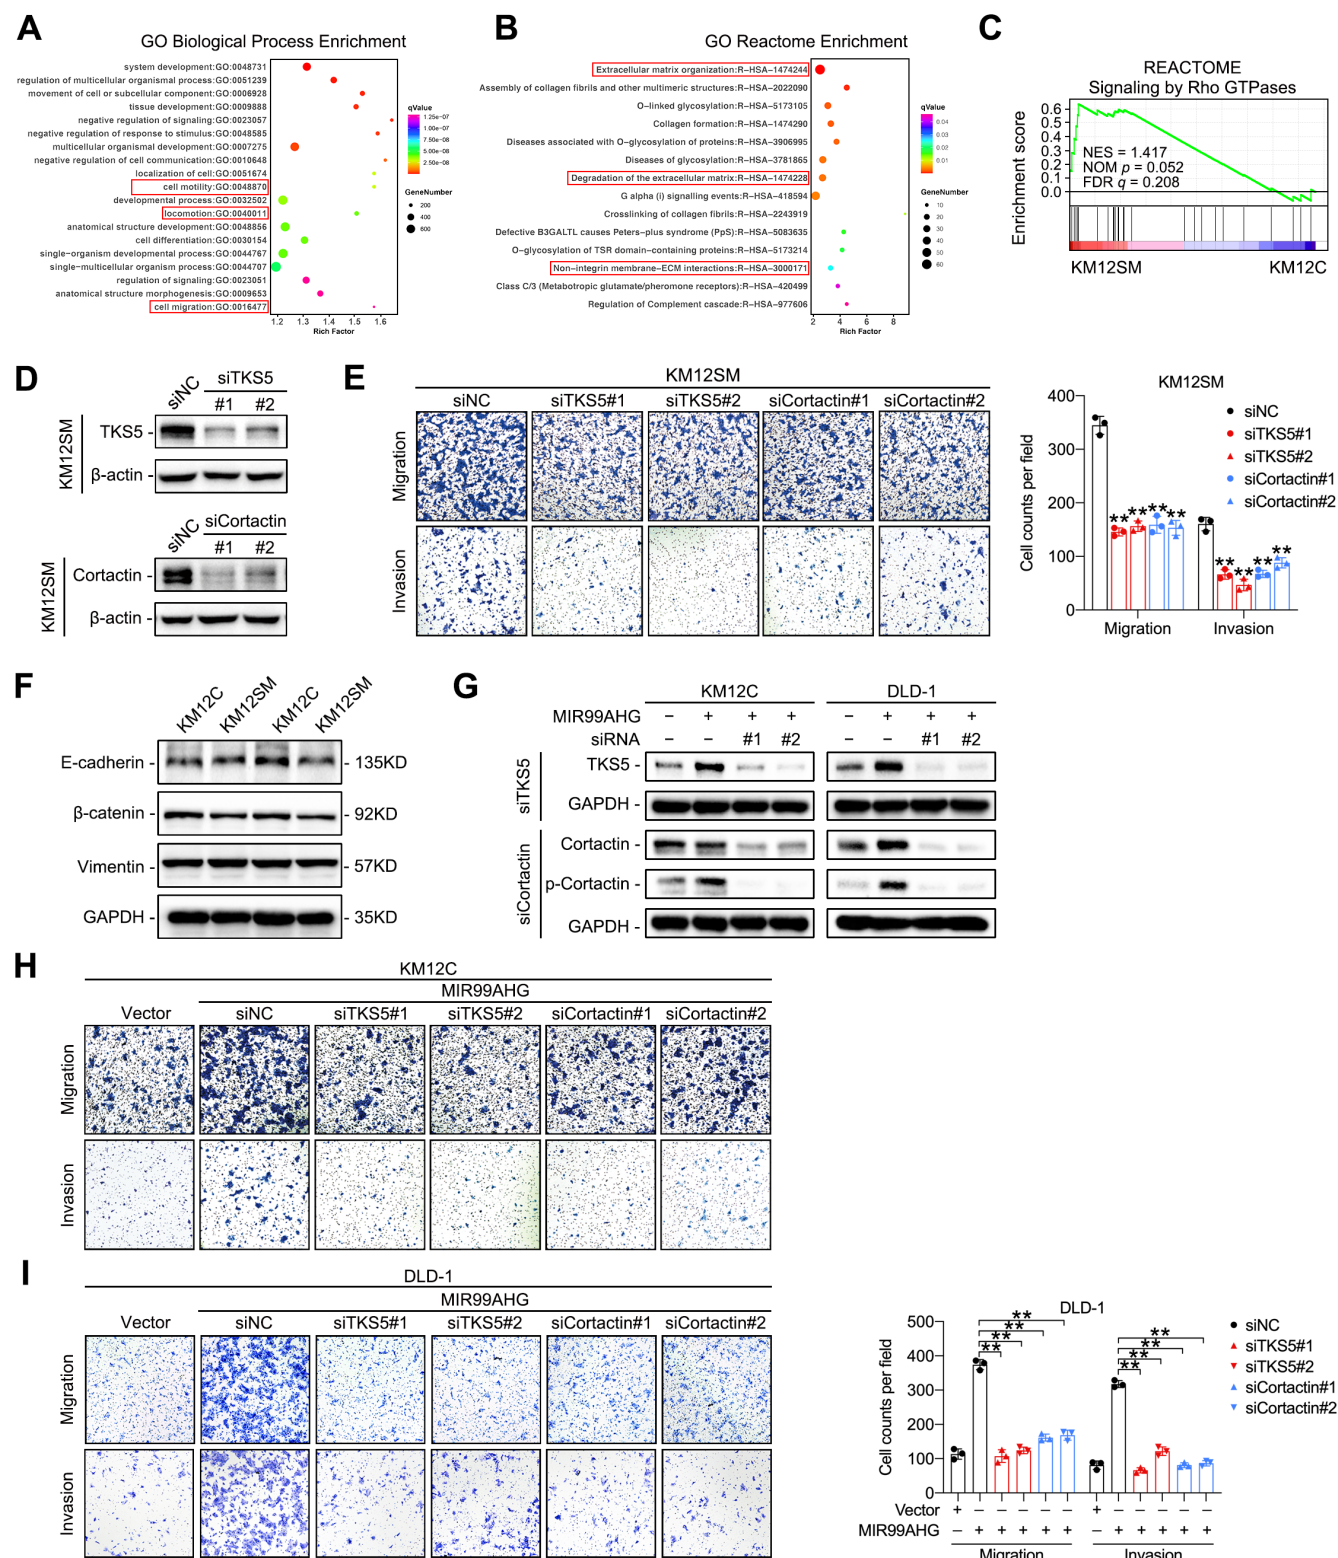

1 **Figure S5. MIR99AHG modulates invadopodia formation in CRC cells**

2 **(A, B)** GO analysis showing the top 20 biological processes (A) and Reactome pathways (B)

3 enriched in KM12SM cells compared to KM12C.

4 **(C)** GSEA plot showing gene signatures enriched in signaling by Rho GTPases in KM12C and

5 KM12SM cells.

6 **(D, E)** Immunoblotting of TKS5 and Cortactin (D) and Transwell migration and invasion assays

7 (E) of KM12SM cells transfected with siRNAs against TKS5 or Cortactin. \*\*  $P < 0.01$  by one-way

8 ANOVA (Dunnett's test).

9 **(F)** Immunoblotting of the indicated EMT-related markers in KM12C and KM12SM cells.

10 **(G)** Immunoblots of TKS5, Cortactin and p-Cortactin of the MIR99AHG-expressing KM12C and

11 DLD-1 cells transfected with siRNA against TKS5 or Cortactin.

12 **(H)** Representative images of Transwell migration and invasion assays in Figure 2L.

13 **(I)** Transwell migration and invasion assays of the MIR99AHG-expressing DLD-1 cells transfected

14 with siRNA against TKS5 or Cortactin. \*\*  $P < 0.01$  by one-way ANOVA (Dunnett's test).



**Figure S6**

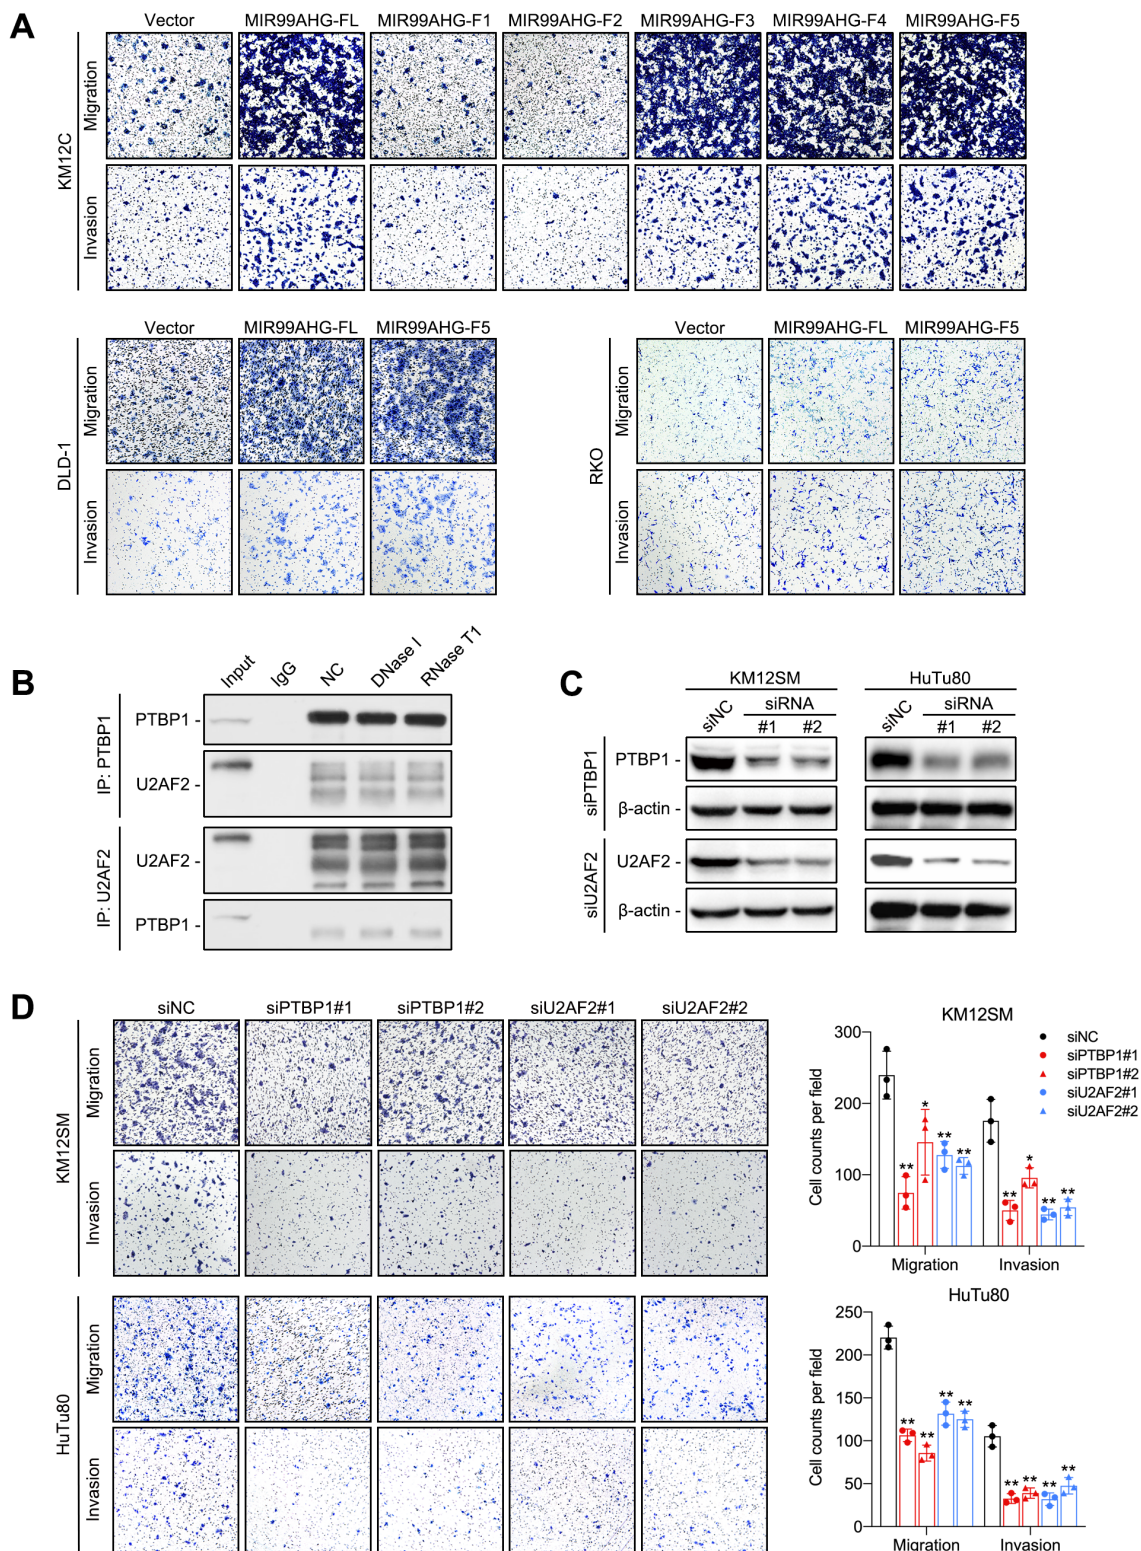

1 **Figure S6. MIR99AHG functions via its interaction with PTBP1 in CRC cells**  
2 **(A)** Representative images of Transwell migration and invasion assays in Figure 3B.  
3 **(B)** KM12SM cells treated with DNase I or RNase T1 were immunoprecipitated with PTBP1 or  
4 U2AF2 antibodies or normal IgG.  
5 **(C)** Immunoblotting of PTBP1 and U2AF2 in KM12SM and HuTu80 cells transfected with siRNAs  
6 against PTBP1, U2AF2 or a negative control.  
7 **(D)** Migration and invasion of KM12SM and HuTu80 cells transfected with siRNAs against PTBP1,  
8 U2AF2 or a negative control. \*\*  $P < 0.01$  by one-way ANOVA (Dunnett's test).

**Figure S7**

**A**

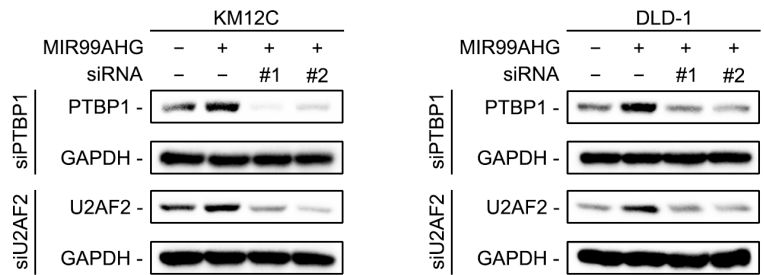

**B**

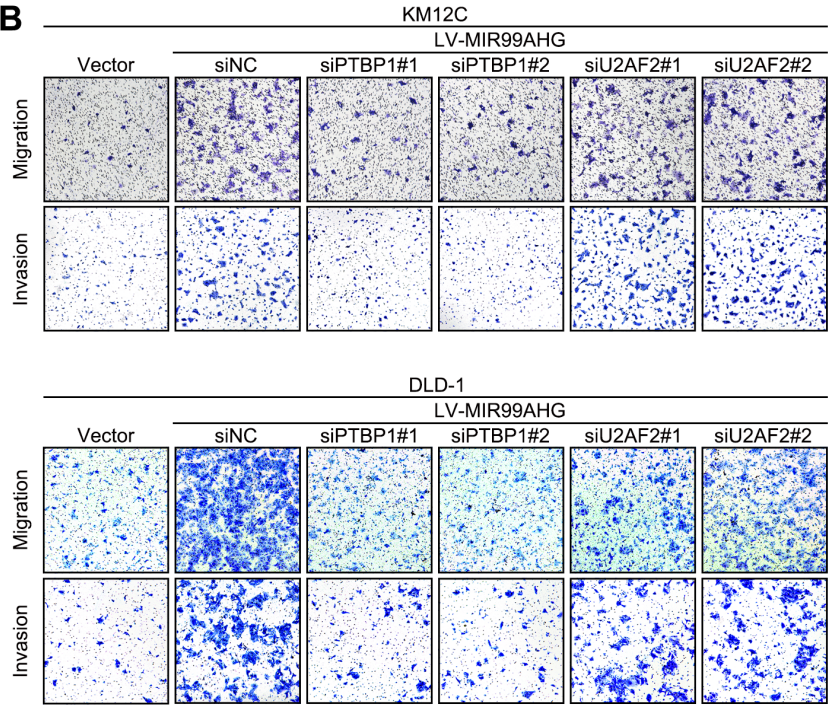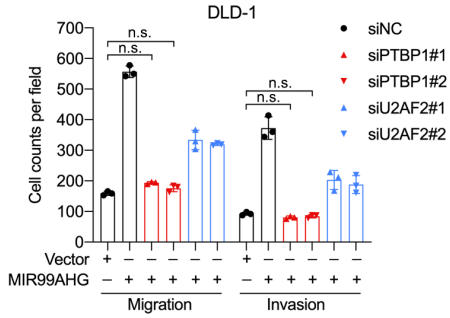

**C**

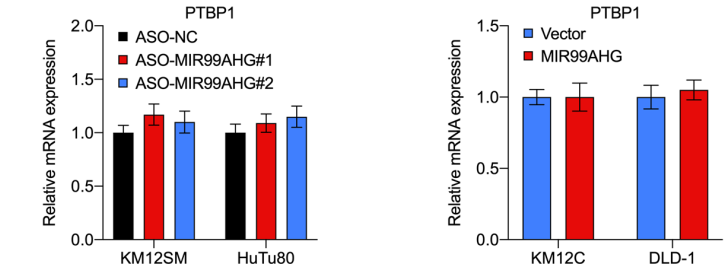



1 **Figure S7. MIR99AHG functions via its interaction with PTBP1 in CRC cells**  
2 **(A)** Immunoblotting of PTBP1 and U2AF2 in parental or MIR99AHG-expressing KM12C and  
3 DLD-1 cells transfected with siRNAs against PTBP1, U2AF2 or a negative control.  
4 **(B)** Migration and invasion of parental or MIR99AHG-expressing KM12C (Figure 4F) and DLD-  
5 1 cells transfected with siRNAs against PTBP1, U2AF2 or a negative control. n.s., not significant.  
6 **(C)** RT-qPCR analysis of PTBP1 mRNA levels after manipulation of MIR99AHG expression in  
7 the indicated CRC cells.

Figure S8

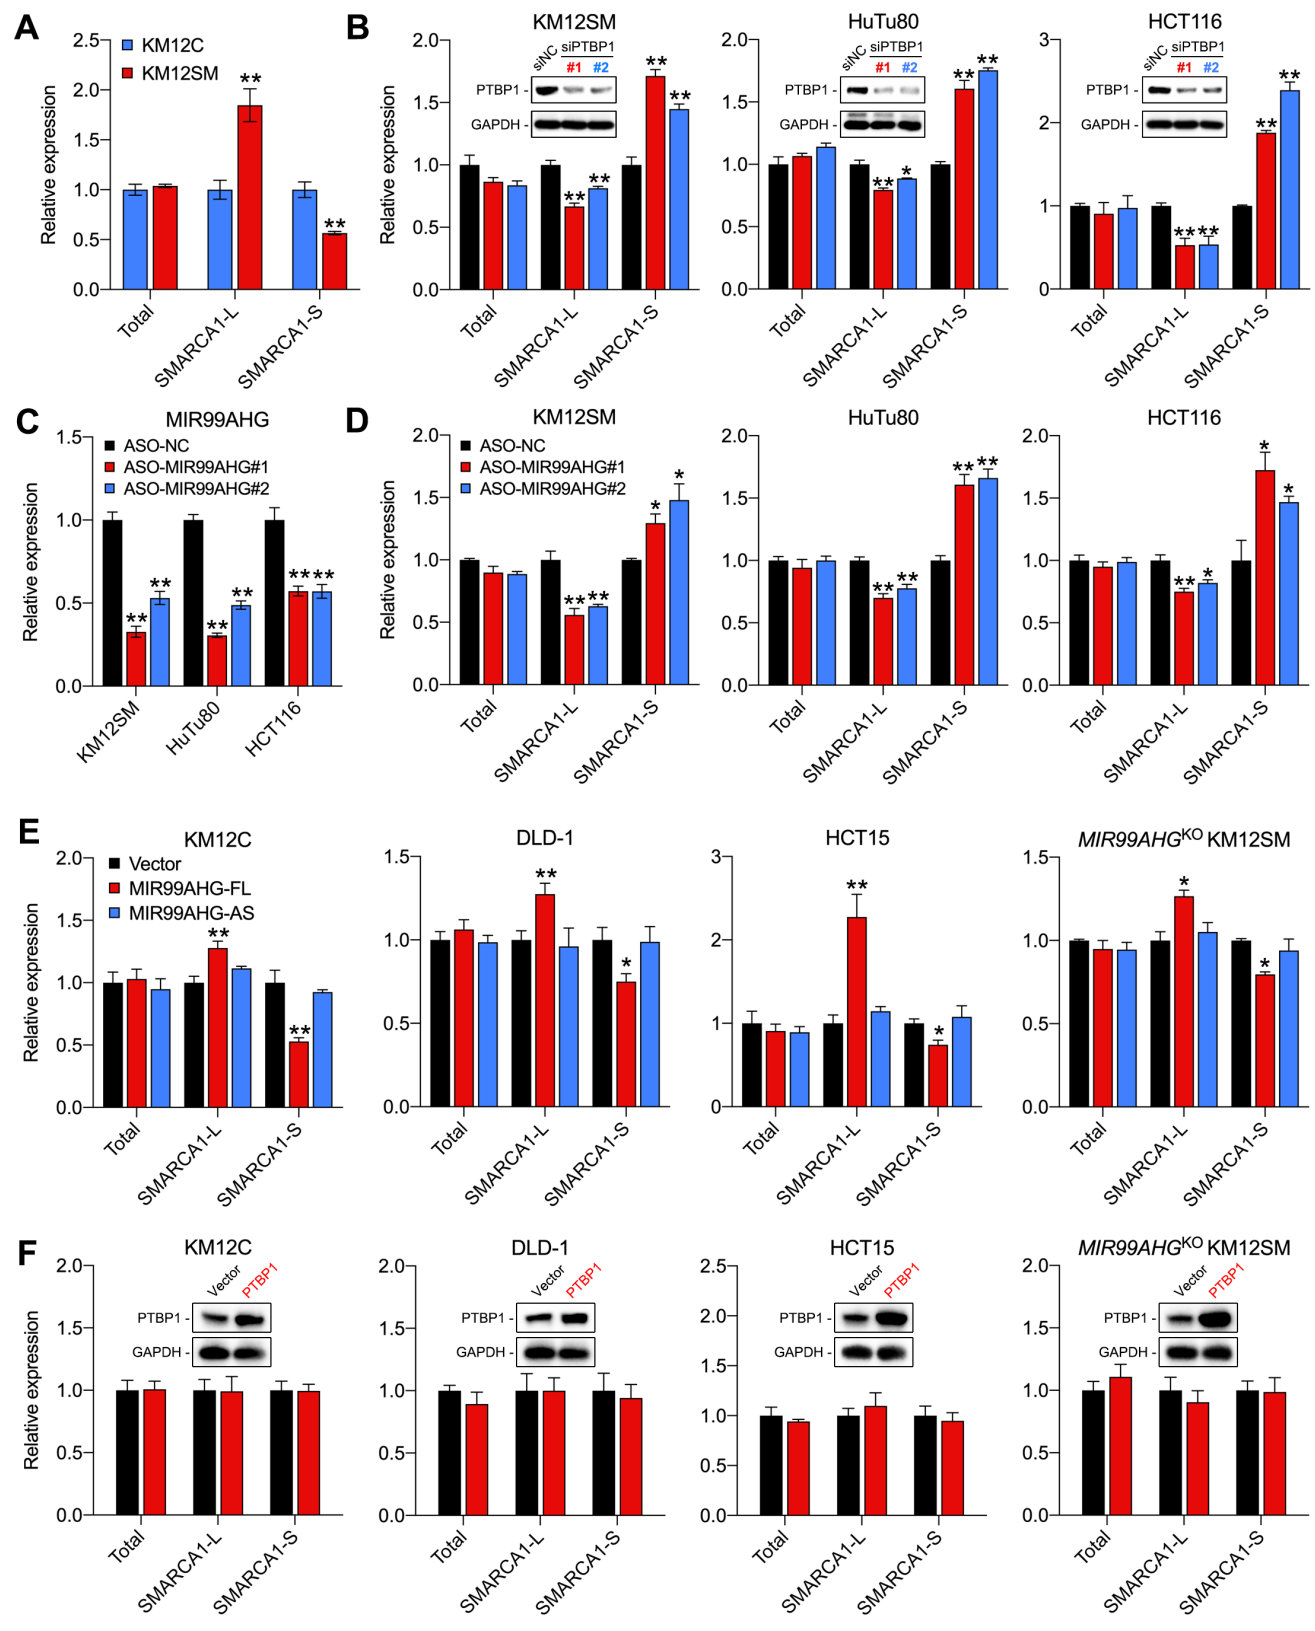

1 **Figure S8. MIR99AHG and PTBP1 regulate the AS of SMARCA1 pre-mRNA**

2 **(A)** RT-qPCR analysis of the total and isoform expression of SMARCA1 in KM12C and KM12SM  
3 cells. \*\*  $P < 0.01$  by Student's *t* test.

4 **(B)** RT-qPCR analysis of the total and isoform expression of SMARCA1 in PTBP1-silenced  
5 KM12SM, HuTu80 and HCT116 cells. Immunoblotting of PTBP1 shows the silencing efficiency  
6 of siRNAs against PTBP1 in the indicated cells. \*\*  $P < 0.01$  by one-way ANOVA (Dunnett's test).

7 **(C)** RT-qPCR analysis of MIR99AHG expression in the indicated cells shows the silencing  
8 efficiency of ASOs against MIR99AHG in the indicated cells. \*\*  $P < 0.01$  by one-way ANOVA  
9 (Dunnett's test).

10 **(D)** RT-qPCR analysis of the total and isoform expression of SMARCA1 in MIR99AHG-silenced  
11 KM12SM, HuTu80 and HCT116 cells. \*\*  $P < 0.01$  by one-way ANOVA (Dunnett's test).

12 **(E, F)** RT-qPCR analysis of the total and isoform expression of SMARCA1 in MIR99AHG-FL or  
13 MIR99AHG-AS (E), or PTBP1 (F)-overexpressing KM12C, DLD-1, HCT15 and *MIR99AHG*<sup>KO</sup>  
14 KM12SM cells. Immunoblotting of PTBP1 shows the efficacy of PTBP1 overexpression in the  
15 indicated cells. \*  $P < 0.05$ , \*\*  $P < 0.01$  by one-way ANOVA (Dunnett's test).

**Figure S9**

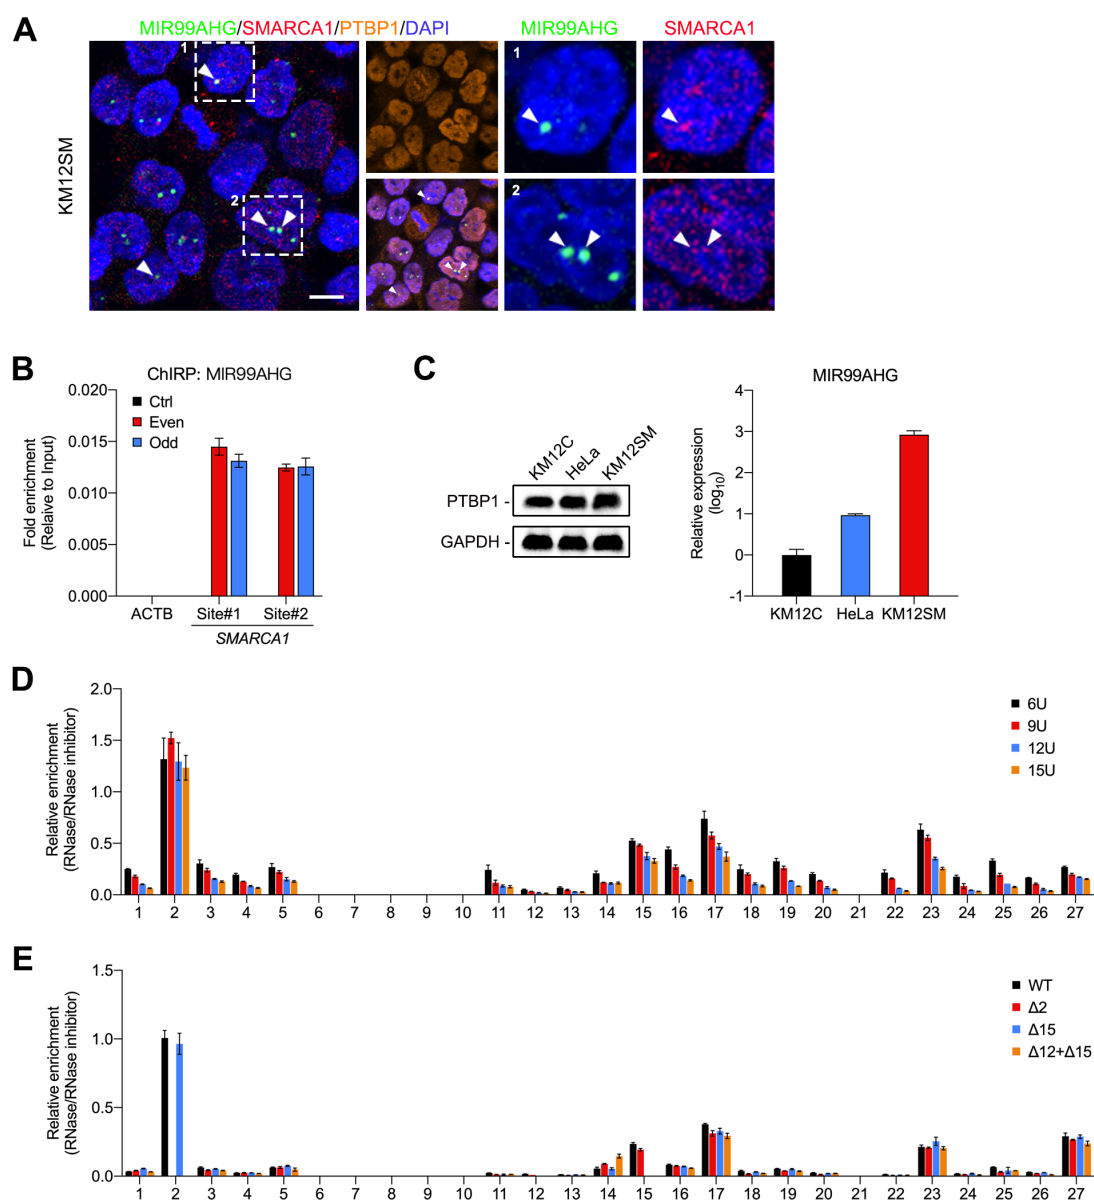

**Figure S9. MIR99AHG modulates the binding position of PTBP1 on SMARCA1 pre-mRNA**

**(A)** Confocal images of MIR99AHG and SMARCA1 pre-mRNA labeled by RNAscope ISH and PTBP1 protein concurrently stained by IF in KM12SM. Scale bar, 10  $\mu$ m.

**(B)** ChIRP-qPCR detecting *SMARCA1* loci retrieved by a specific probe for MIR99AHG or by an unspecific control probe. ACTB was used as a negative control. SMARCA1#1 and #2 indicate different primers detecting the segments around PTBP1-binding sites #2 and #15, respectively. “Even” and “odd” indicate the two groups of biotin-labeled probe sets designed for MIR99AHG.

**(C)** Immunoblotting of PTBP1 and RT-qPCR analysis of MIR99AHG in KM12C, HeLa and KM12SM cells.

**(D)** HuTu80 cells treated with different concentrations of RNase T1 followed by an RIP-based mapping assay to identify the region on SMARCA1 pre-mRNA associated with PTBP1.

**(E)** qPCR validation of the binding sites of PTBP1 on the WT and mutant SMARCA1 minigene constructs by RIP-based mapping assays in KM12C cells.

Figure S10

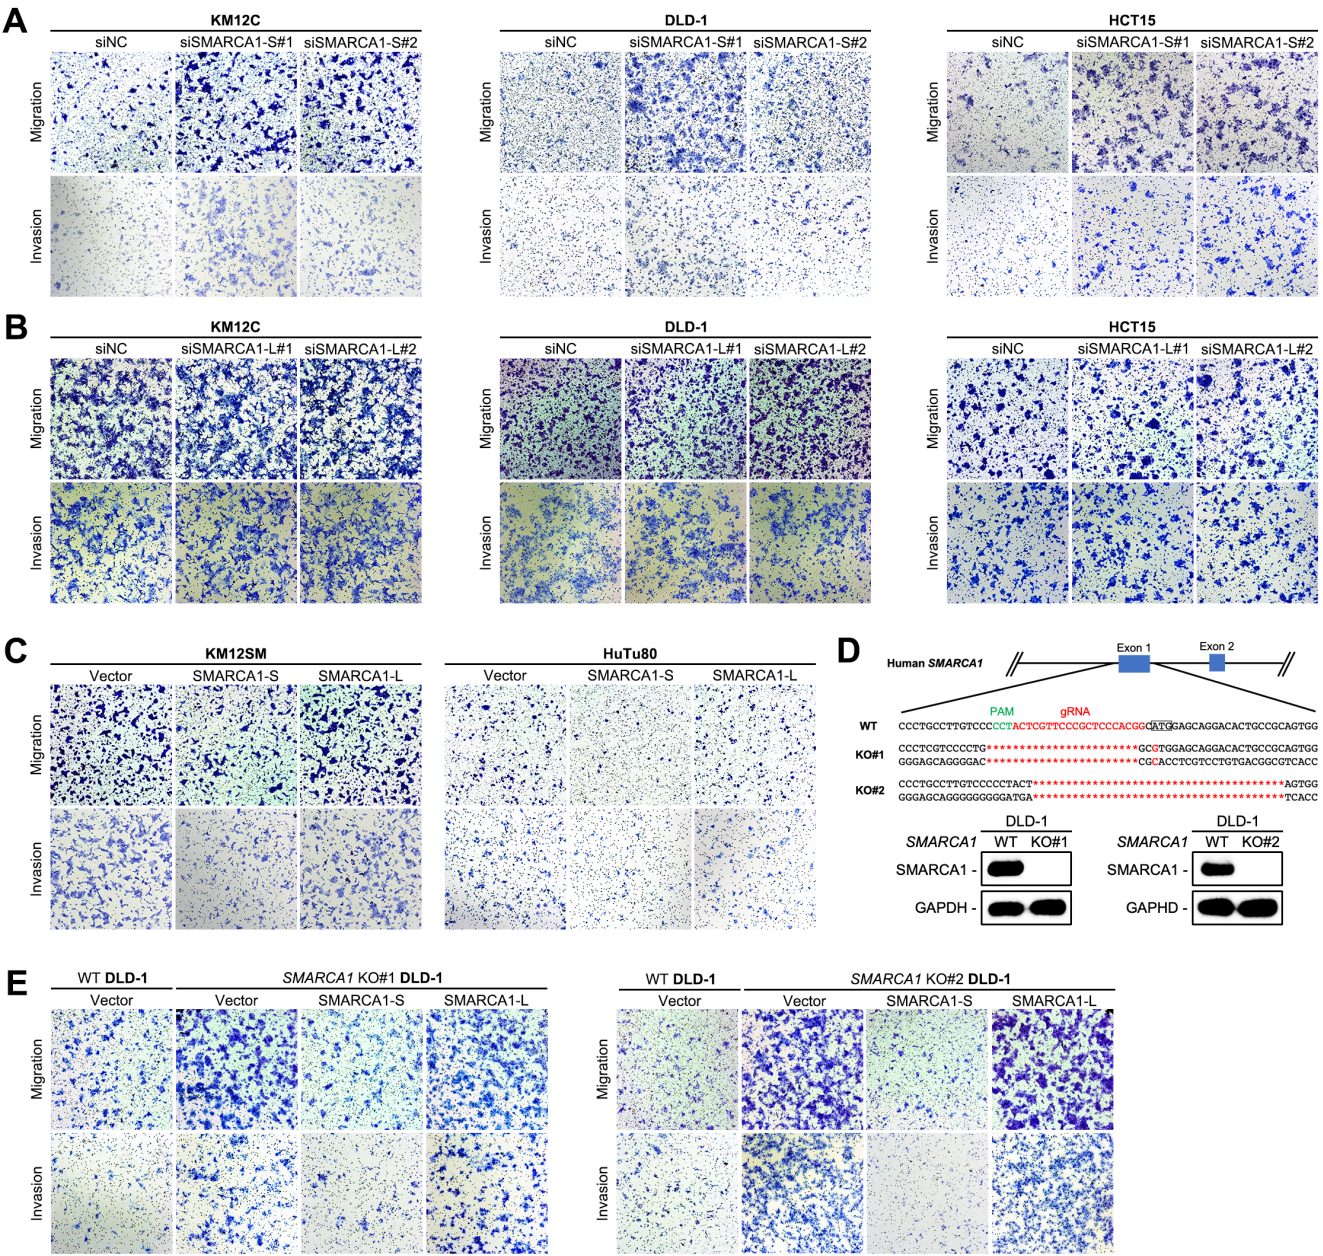

1 **Figure S10. SMARCA1-S inhibits migration and invasion of CRC cells**  
2 **(A, B)** Representative images of Transwell migration and invasion assays in Figure 6A (A) and  
3 Figure 6B (B).  
4 **(C)** Representative images of Transwell migration and invasion assays in Figure 6E.  
5 **(D)** Top, *SMARCA1*<sup>KO</sup> DLD-1 cells were generated by CRISPR/Cas9-mediated genome editing.  
6 Sequences of the targeted region and the two knockout alleles (KO#1 and KO#2) are shown.  
7 Bottom, immunoblotting validation of SMARCA1 expression in *SMARCA1* WT and KO DLD-1  
8 cells.  
9 **(E)** Representative images of Transwell migration and invasion assays in Figure 6G.



Figure S11

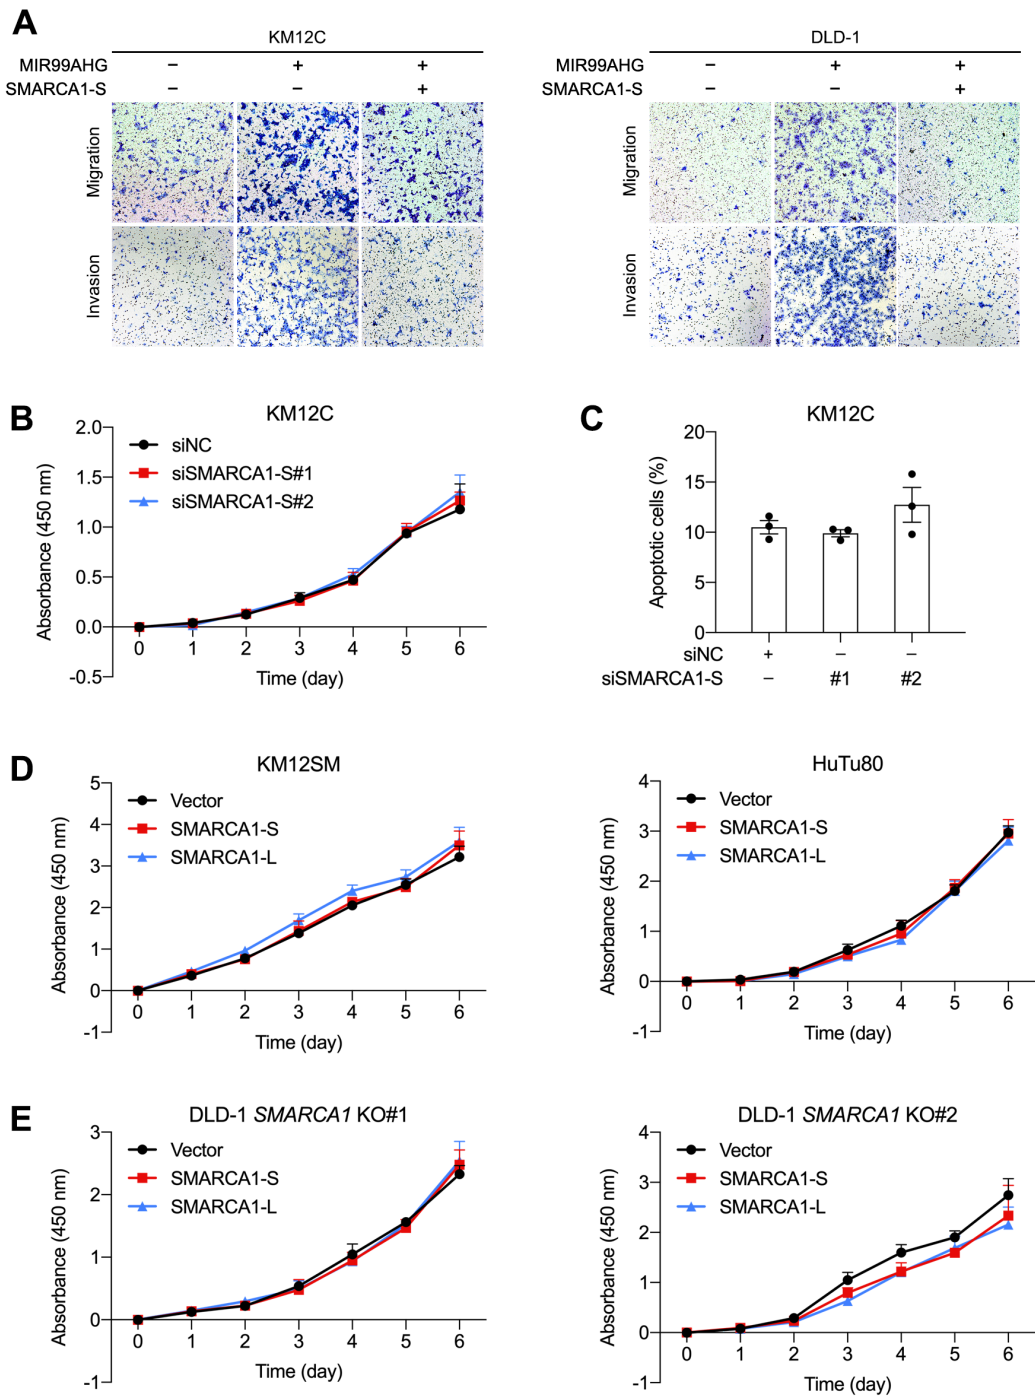



1 **Figure S11. SMARCA1 has no effect on proliferation and apoptosis of CRC cells**  
2 **(A)** Representative images of Transwell migration and invasion assays in Figure 6H.  
3 **(B, C)** Growth curves (B) and apoptosis rates (C) of KM12C cells transfected with siRNAs against  
4 SMARCA1-S.  
5 **(D, E)** Growth curves of KM12SM and HuTu80 (C) or *MIR99AHG*<sup>KO</sup> DLD-1 (D) cells transfected  
6 with vectors expressing SMARCA1-S or SMARCA1-L.

Figure S12

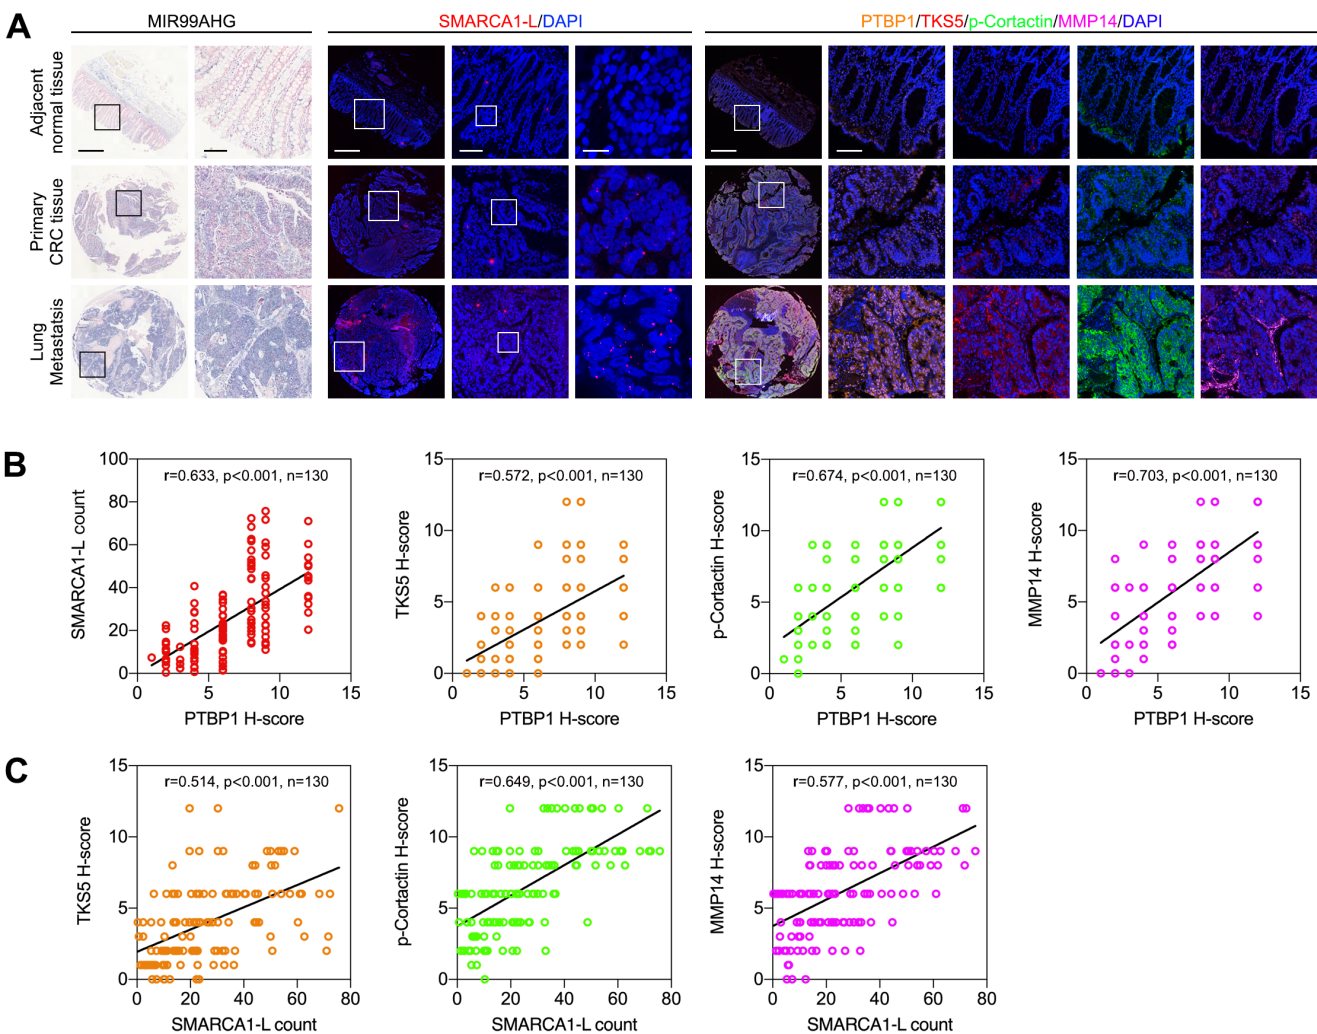

**Figure S12. Validation of the MIR99AHG/PTBP1/SMARCA1-L axis in CRC specimens**

**(A)** Left, representative images of ISH staining for MIR99AHG in TMAs containing 48 pairs of primary CRC tissues with their adjacent normal tissues and matched metastatic tissues. Scale bars: main, 500  $\mu\text{m}$ ; inset, 100  $\mu\text{m}$ . Middle, confocal images of RNAscope ISH for SMARCA1-L in serial sections of TMAs. Scale bars (from left to right): 500  $\mu\text{m}$ , 100  $\mu\text{m}$ , 20  $\mu\text{m}$ . Right, multispectral staining and imaging for PTBP1, TKS5, p-Cortactin and MMP14 in serial sections of TMAs. Scale bars: main, 500  $\mu\text{m}$ ; inset, 100  $\mu\text{m}$ .

**(B)** Associations between PTBP1 levels and SMARCA1-L, TKS5, p-Cortactin or MMP14 levels in CRC tissues (n=130). Pearson correlation coefficients (r) and P values are shown.

**(C)** Associations between SMARCA1-L levels and TKS5, p-Cortactin or MMP14 levels in CRC tissues (n=130). Pearson correlation coefficients (r) and P values are shown.

**Supplementary Table 1.** Cassette exon events commonly regulated by MIR99AHG and PTBP1 in KM12SM cells.

| Gene<br>Symbol | Exon Start<br>(ES) <sup>1</sup> | Exon End<br>(EE) | Upstream<br>ES | Upstream<br>EE | Downstream<br>ES | Downstream<br>EE | MIR99AHG <sup>2</sup> |       | PTBP1 <sup>3</sup> |       |
|----------------|---------------------------------|------------------|----------------|----------------|------------------|------------------|-----------------------|-------|--------------------|-------|
|                |                                 |                  |                |                |                  |                  | PSI                   | p     | PSI                | p     |
| TRPT1          | 64225785                        | 64225869         | 64224800       | 64225580       | 64226049         | 64226148         | -0.37                 | 0.000 | -0.44              | 0.000 |
| C9orf147       | 112484929                       | 112485163        | 112484528      | 112484624      | 112486389        | 112486505        | -0.75                 | 0.002 | -1.00              | 0.001 |
| BCS1L          | 218660036                       | 218660245        | 218659734      | 218659743      | 218660938        | 218661307        | -0.81                 | 0.000 | -0.5               | 0.001 |
| SMARCA1        | 129493039                       | 129493075        | 129491940      | 129492093      | 129496749        | 129496871        | -0.66                 | 0.002 | -0.94              | 0.000 |
| U2AF1L4        | 35744625                        | 35744692         | 35744322       | 35744421       | 35745124         | 35745157         | -0.42                 | 0.002 | -0.38              | 0.009 |
| SLMAP          | 57865241                        | 57865292         | 57864547       | 57864716       | 57871635         | 57871698         | -0.33                 | 0.007 | -0.72              | 0.003 |
| LYRM1          | 20902485                        | 20902717         | 20900449       | 20900535       | 20915555         | 20915714         | -0.70                 | 0.000 | -0.63              | 0.000 |
| FRMD8          | 65393572                        | 65393674         | 65389360       | 65389528       | 65394040         | 65394099         | -0.35                 | 0.000 | -0.36              | 0.000 |
| ZNF362         | 33270486                        | 33270612         | 33256572       | 33256654       | 33276099         | 33276163         | -0.79                 | 0.004 | -1.00              | 0.001 |
| GBAP1          | 155217518                       | 155217593        | 155217239      | 155217373      | 155217963        | 155218049        | -0.81                 | 0.002 | -0.79              | 0.000 |
| CAPS2          | 75390321                        | 75390381         | 75359883       | 75361019       | 75390837         | 75390901         | -0.77                 | 0.005 | -1.00              | 0.001 |
| FANCI          | 89245194                        | 89245311         | 89244016       | 89244067       | 89247628         | 89247731         | -0.34                 | 0.000 | -0.98              | 0.000 |
| CBWD5          | 65708901                        | 65708958         | 65702969       | 65703014       | 65720040         | 65720092         | 0.85                  | 0.000 | 0.74               | 0.000 |
| PPARG          | 12301520                        | 12301849         | 12287982       | 12288020       | 12312379         | 12312453         | 0.98                  | 0.000 | 0.85               | 0.000 |
| MX1            | 41449136                        | 41449295         | 41445999       | 41446141       | 41451166         | 41451243         | 0.38                  | 0.000 | 0.55               | 0.000 |
| HCG18          | 30314268                        | 30314482         | 30296131       | 30296237       | 30326008         | 30326334         | 0.62                  | 0.000 | 0.63               | 0.000 |
| ITGB1BP1       | 9418625                         | 9418732          | 9412268        | 9412405        | 9423372          | 9423430          | 0.89                  | 0.000 | 0.32               | 0.000 |
| HNRNPH1        | 179617059                       | 179617110        | 179616868      | 179616958      | 179617513        | 179617581        | 0.55                  | 0.000 | 0.35               | 0.000 |
| DUSP16         | 12554535                        | 12554659         | 12521080       | 12521463       | 12560999         | 12561077         | 0.62                  | 0.000 | 0.81               | 0.000 |
| C6orf99        | 158873527                       | 158873621        | 158870139      | 158870310      | 158895220        | 158895366        | 0.61                  | 0.000 | 0.82               | 0.000 |

1. Data regarding the start and end positions of the exon and the upstream and downstream exons were collected from the UCSC Genome Browser (<https://genome.ucsc.edu>).
2. ASO-NC versus ASO-MIR99AHG.
3. siNC versus siPTBP1.

**Supplementary Table 2.** Clinical information of patients providing primary CRC tissues and matched adjacent normal tissues or metastatic tissues for this study.

| No. <sup>1</sup> | Sex | Age | Primary site | Metastatic site | Differentiation |
|------------------|-----|-----|--------------|-----------------|-----------------|
| 1                | F   | 53  | right colon  | liver           | G2              |
| 2                | F   | -   | left colon   | liver           | G2              |
| 3                | M   | 61  | left colon   | liver           | G2-3            |
| 4                | F   | 66  | right colon  | liver           | G2-3            |
| 5                | M   | 60  | left colon   | liver           | G2              |
| 6                | M   | 73  | left colon   | liver           | G2              |
| 7                | M   | 61  | right colon  | liver           | G2              |
| 8                | M   | 47  | right colon  | abdominal wall  | G2              |
| 9                | M   | 46  | rectum       | liver           | G2              |
| 10               | M   | 67  | rectum       | liver           | G2              |
| 11               | M   | -   | rectum       | liver           | G2              |
| 12               | M   | 50  | rectum       | chest wall      | G2              |
| 13               | M   | 59  | rectum       | liver           | G3              |
| 14               | M   | 59  | rectum       | liver           | G2              |
| 15               | M   | 50  | left colon   | lung            | G2              |
| 16               | M   | -   | right colon  | lung            | G2              |
| 17               | M   | 71  | left colon   | mesothelium     | G2              |
| 18               | -   | -   | left colon   | anal canal      | G2              |
| 19               | F   | 50  | left colon   | ureter          | G2              |
| 20               | F   | 55  | left colon   | abdominal wall  | G3              |
| 21               | M   | 73  | left colon   | abdominal wall  | G3              |
| 22               | M   | 47  | left colon   | abdominal wall  | G3              |
| 23               | M   | 63  | right colon  | abdominal wall  | G2              |
| 24               | M   | 63  | rectum       | liver           | G2-3            |
| 25               | F   | 53  | rectum       | liver           | G2              |
| 26               | M   | 62  | rectum       | liver           | G2              |
| 27               | F   | 66  | rectum       | liver           | G2              |
| 28               | M   | 60  | rectum       | liver           | G2              |
| 29               | M   | 50  | left colon   | lymph node      | G3              |
| 30               | F   | 54  | left colon   | lymph node      | G2              |
| 31               | F   | 50  | right colon  | lymph node      | G1-2            |

|    |   |    |             |            |      |
|----|---|----|-------------|------------|------|
| 32 | M | -  | left colon  | lymph node | G1-2 |
| 33 | M | 58 | left colon  | lymph node | G2-3 |
| 34 | M | 48 | left colon  | lymph node | G3   |
| 35 | F | 75 | right colon | lymph node | G2   |
| 36 | F | 54 | right colon | lymph node | G1-2 |
| 37 | M | 45 | left colon  | lymph node | G2   |
| 38 | F | 57 | right colon | lymph node | G2   |
| 39 | F | 43 | right colon | lymph node | G3   |
| 40 | M | 70 | left colon  | lymph node | G2-3 |
| 41 | M | 51 | right colon | lymph node | G3   |
| 42 | M | 56 | left colon  | lymph node | G2-3 |
| 43 | M | 57 | right colon | lymph node | G2-3 |
| 44 | F | 68 | left colon  | lymph node | G2   |
| 45 | F | 37 | right colon | lymph node | G3   |
| 46 | F | 80 | right colon | lymph node | G3   |
| 47 | M | 52 | left colon  | lymph node | G3   |
| 48 | M | 62 | left colon  | lymph node | G2-3 |

1. Only Patients 14-28 provided primary CRC tissues and matched metastatic tissues; the rest of the patients provided primary CRC tissues, matched adjacent normal tissues and metastatic tissues.

**Supplementary Table 3.** Oligonucleotides used in this study

| Oligonucleotide                | Sequence (5'-3')                                                    |
|--------------------------------|---------------------------------------------------------------------|
| qPCR primers for MIR99AHG      | F: CTATTAGCACATAATTTCAGATACATTAG<br>R: AATTCATTGACAACAGAGAAAACTCAAC |
| qPCR primers for GAPDH         | F: GCACCGTCAAGGCTGAGAAC<br>R: TGGTGAAGACGCCAGTGGA                   |
| qPCR primers for PTBP1         | F: GAGATGAACACGGAGGAG<br>R: TGGAGAACTGGATGTAGATG                    |
| qPCR primers for 7SK           | F: ATCGCCAGGGTTGATTCGGCTGAT<br>R: GGATGTGTCTGGAGTCTTGGAAGC          |
| qPCR primers #1 for MIR99AHG#5 | F: TCGCAACACTTCACAAGGGTCAAGC<br>R: ACTTTACCCTTCTGTCGGCCCATCC        |
| qPCR primers #2 for MIR99AHG#5 | F: TACACTCTAAGACCAGGGATGGGCC<br>R: GCACAACCTGGGCTGGAACAGTATTG       |
| qPCR primers #3 for MIR99AHG#5 | F: GTGCAAACTGGTGAAATAAAAGGC<br>R: TCATTAATTTCTCTTAGATGGATGCCC       |
| qPCR primers #4 for MIR99AHG#5 | F: ACAACAGTTTGGGTAACTGGATTCC<br>R: TGGAGGAGGTTTGAGAGTAAATGGT        |
| qPCR primers #5 for MIR99AHG#5 | F: CCCCTCCATCTATAACGCTTTCTGC<br>R: GAACAGAGAGCCCTCAAGAAGCAGA        |
| qPCR primers #6 for MIR99AHG#5 | F: ATCTGTGGAACACCAGCCAAGTC<br>R: ATGTGGAATAATTCATTGACAACAGAG        |
| qPCR primers #7 for MIR99AHG#5 | F: CCTCCCCGTTGTCCAAATATTACTG<br>R: CCAGGGAGTTAGGAATGAGCGAATG        |
| qPCR primers #8 for MIR99AHG#5 | F: TAACATCATTCGCTCATTCCTAACTCC<br>R: GAGAAACAATAAAGGACAAATAACCCAG   |
| qPCR primers #9 for MIR99AHG#5 | F: TCATTGATGAACTGGGTTATTTGTCC<br>R: CCTAGCTCAAAGCTTACAGAAAATACAGG   |
| PCR primers for SMARCA1-Total  | F: TTTGGAAGATTATTGCATGTGGC<br>R: TTGTAGATCAACCTGTGGGTTC             |
| PCR primers for SMARCA1-L      | F: AGAAGTGGAATTTCTGGGTCAAAGG<br>R: TTGTAGATCAACCTGTGGGTTC           |
| PCR primers for SMARCA1-S      | F: CATGAAGAAAGAGAGGAAGCAATAG<br>R: TTGTAGATCAACCTGTGGGTTC           |



---

|                                                               |                                                              |
|---------------------------------------------------------------|--------------------------------------------------------------|
| qPCR primers for MALAT1                                       | F: GCTGACCCAGGTGCTACACAGAAGT<br>R: AAATCGCACTGGCTCCTGGACTC   |
| qPCR primers for U2 snRNA                                     | F: CGGCCTTTTGGCTAAGATCAAGT<br>R: GCTCCTATTCCATCTCCCTGCTC     |
| qPCR primers for KCNQ1OT1                                     | F: CCGCAGATGACAACCACTTCCTTAG<br>R: TAGGTTGTGGGACTGGAAGTGCTTG |
| qPCR primers #1 for SMARCA1<br>(from intron 12 to intron 13)  | F: TTTTGCCTTTTCTTTAGGTGGGTGC<br>R: AATCAATGGAATGGAAGCCCACTG  |
| qPCR primers #2 for SMARCA1<br>(from intron 12 to intron 13)  | F: AGTGTGGCTTCCATTCCATTGATTC<br>R: AATAAGGATGGGATGGTGTAGTGCC |
| qPCR primers #3 for SMARCA1<br>(from intron 12 to intron 13)  | F: CATTTTCTTTTCCTAATTTGCCAGC<br>R: TGCTTCATGAGTCTTTAGGGTTGCT |
| qPCR primers #4 for SMARCA1<br>(from intron 12 to intron 13)  | F: AACATTGGGACACTAAAAGGTTGGC<br>R: AACGCATTAGACCCATGACATTTGT |
| qPCR primers #5 for SMARCA1<br>(from intron 12 to intron 13)  | F: CTCACAAATGTCATGGGTCTAATGC<br>R: GCTCTGAAGGATCACAGAAAACAGA |
| qPCR primers #6 for SMARCA1<br>(from intron 12 to intron 13)  | F: GCAAGTCCTCACTTAATGTCGTTGC<br>R: TCAGCCTCCTGAGTAGCTGGGATTA |
| qPCR primers #7 for SMARCA1<br>(from intron 12 to intron 13)  | F: TAATCCCAGCTACTCAGGAGGCTGA<br>R: CAGAGTCTCATTATGTCACCCAGGC |
| qPCR primers #8 for SMARCA1<br>(from intron 12 to intron 13)  | F: CAGCCTGGGTGACATAATGAGACTC<br>R: TGGTATTACAGGCATGAGCCAACAC |
| qPCR primers #9 for SMARCA1<br>(from intron 12 to intron 13)  | F: AGGAGGATTGCTTGAGGCTAGTCAG<br>R: TCCAGAGGAGCAAGGACTACAGGTG |
| qPCR primers #10 for SMARCA1<br>(from intron 12 to intron 13) | F: AGGAGTTTGAGGCTGCAGTGAGATG<br>R: GACCAGAAATATGCCACAGGAACTG |
| qPCR primers #11 for SMARCA1<br>(from intron 12 to intron 13) | F: GTTCCTGTGGCATATTTCTGGTCAC<br>R: CTCCAACCACTGTAATCCTGAACTG |
| qPCR primers #12 for SMARCA1<br>(from intron 12 to intron 13) | F: GAACTAGCCCTGGACAGAATGCC<br>R: TGTCTGTATGAGTTTTCTCTGTGCCC  |
| qPCR primers #13 for SMARCA1<br>(from intron 12 to intron 13) | F: ATGATGTTACTTGAGGACCTGCTGT<br>R: GTGAAGTTGGTGCTAAAATTCAGGT |
| qPCR primers #14 for SMARCA1<br>(from intron 12 to intron 13) | F: TAGGCTTCTTTCTCTGACAATGTTG<br>R: GAGAGAGTCCTTGTAGCCTGAGATG |

---

---

|                                                               |                                                                      |
|---------------------------------------------------------------|----------------------------------------------------------------------|
| qPCR primers #15 for SMARCA1<br>(from intron 12 to intron 13) | F: CTACAAGGACTCTCTCTTAGCCCGC<br>R: GCTTGCTGTGAACACTATGCTATGC         |
| qPCR primers #16 for SMARCA1<br>(from intron 12 to intron 13) | F: GCTACCTCTATGGGGAAACAGTTGC<br>R: CTCAGTAACGCTTCAAGTTGCCATC         |
| qPCR primers #17 for SMARCA1<br>(from intron 12 to intron 13) | F: GAATATCATGGCAGAGCAGTACGTG<br>R: TCTCTGAGGGGATAACATTGTTTGG         |
| qPCR primers #18 for SMARCA1<br>(from intron 12 to intron 13) | F: CCTGCTTTCCTTTATGTTGTCCAC<br>R: GACGATGACCAGTGGCTTTGTTAGC          |
| qPCR primers #19 for SMARCA1<br>(from intron 12 to intron 13) | F: CAGCAGCGCGGTAAAGTATTGGTAT<br>R: TAGCAAAAACCTTGGGCATGAATCAC        |
| qPCR primers #20 for SMARCA1<br>(from intron 12 to intron 13) | F: CTTTACCTGCTCTGCTGACTGTGAC<br>R: GCATAATCACAAAGTATGGGCAATC         |
| qPCR primers #21 for SMARCA1<br>(from intron 12 to intron 13) | F: AATATATGACTGCTGAAGGAAGTTTTG<br>R: GTACATCCATAGGGTGAAATATTATCC     |
| qPCR primers #22 for SMARCA1<br>(from intron 12 to intron 13) | F: TTCATCCCCCTATTCTTGATCGTTT<br>R: CCTAAGGAAATAATCAGAGATGTGCAC       |
| qPCR primers #23 for SMARCA1<br>(from intron 12 to intron 13) | F: AGAAGTGGAATTTCTGGGTCAAAGG<br>R: CATTGCTGCTGGGAGTATAAATTGG         |
| qPCR primers #24 for SMARCA1<br>(from intron 12 to intron 13) | F: CCCCCTCATCAACATTGAGTATTAT<br>R: ACAAAGTCCAGTAGAAAAATGAGCAG        |
| qPCR primers #25 for SMARCA1<br>(from intron 12 to intron 13) | F: TCCCTGGATTGTCATCCTGATTTTC<br>R: GGCAACGGATAAAGGGGAAAGTAAG         |
| qPCR primers #26 for SMARCA1<br>(from intron 12 to intron 13) | F: CCTCCTAGATATATTTTCAGCTCTCACTC<br>R: AAGTTCCTAATCTTTAAAAGCTTACATCG |
| qPCR primers #27 for SMARCA1<br>(from intron 12 to intron 13) | F: TTATGCTAAGTACCAGGGCTGGAGG<br>R: CAACCTGTGGGTTCCAGTCTGAATC         |
| qPCR primers for ACTB                                         | F: GCACTCTTCCAGCCTTCCTTC<br>R: TTGGCGTACAGGTCTTTGCGGA                |
| qPCR primers for pre-SMARCA1#1                                | F: TATACTATATGTAAAGTACAGTATC<br>R: GAAATTCCACTTCTAGGAATTTATC         |
| qPCR primers for pre-SMARCA1#2                                | F: AGAAGTGGAATTTCTGGGTCAAAGG<br>R: TCACAGAACAAATACAAATGGTTAG         |
| scrambled siRNA control                                       | UUCUCCGAACGUGUCACGUTT                                                |
| siRNA#1 targeting TKS5                                        | GCCAAAGCAAGGACGAGAUTT                                                |

---

---

|                              |                        |
|------------------------------|------------------------|
| siRNA#2 targeting TKS5       | AAACCAGUGGCGACCUGAATT  |
| siRNA#1 targeting Cortactin  | CCAGGAGCAUAUCAACAUATT  |
| siRNA#2 targeting Cortactin  | GCAACUUAUUGUAUCUGAATT  |
| siRNA#1 targeting PTBP1      | CCCUCAUUGACCUGCACAATT  |
| siRNA#2 targeting PTBP1      | GCACAGUGUUGAAGAUAUATT  |
| siRNA#1 targeting U2AF2      | GCAGCUCAACGAGAAUAAAATT |
| siRNA#2 targeting U2AF2      | GCAGUACAAGGCCAUGCAATT  |
| siRNA#1 targeting SMARCA1-L  | GAAAGAGAGGAUAAAUUCCTT  |
| siRNA#2 targeting SMARCA1-L  | GGGUCAAAGGGAAGCAAUATT  |
| siRNA#1 targeting SMARCA1-S  | CAUGAAGAAAGAGAGGAAGTT  |
| siRNA#2 targeting SMARCA1-S  | GAGAGGAAGCAAUAGAGGCTT  |
| CHIRP probes for MIR99AHG#1  | TTAAGTTTTCTGCATCCGTG   |
| CHIRP probes for MIR99AHG#2  | AGAAGGTCTGTTCAGTGGAA   |
| CHIRP probes for MIR99AHG#3  | CCGGGAACCATAAGAAGACA   |
| CHIRP probes for MIR99AHG#4  | ACACTCTACCTGGATATCTT   |
| CHIRP probes for MIR99AHG#5  | TTATCCTTGTGTACTCATGC   |
| CHIRP probes for MIR99AHG#6  | GCTTTATTCTGGATTTAGTT   |
| CHIRP probes for MIR99AHG#7  | AGGATTTGGGGAAGACTCTC   |
| CHIRP probes for MIR99AHG#8  | ATAGTCATGTCACAGGTAGG   |
| CHIRP probes for MIR99AHG#9  | CCTCATTCATTCTCCAAGAA   |
| CHIRP probes for MIR99AHG#10 | GATTATTCAGCCAATTGCTC   |
| CHIRP probes for MIR99AHG#11 | AACTGGATTGAGTCTGTAGC   |
| CHIRP probes for MIR99AHG#12 | TGTTGCTATCTTTACCTTGA   |
| CHIRP probes for MIR99AHG#13 | TCTCTTAAGATGCATTCTGT   |
| CHIRP probes for MIR99AHG#14 | CCTCGAGACTTGAGTGGAAA   |
| CHIRP probes for MIR99AHG#15 | TTAGATGGATGCCCATTTTG   |
| CHIRP probes for MIR99AHG#16 | ACCTTTTACAGATGTGCAGA   |
| CHIRP probes for MIR99AHG#17 | GAACAGAGAGCCCTCAAGAA   |
| CHIRP probes for MIR99AHG#18 | GAGTTAGGAATGAGCGAATG   |
| CHIRP probes for LacZ#1      | CGAGCTCGAATTCGTAATCA   |
| CHIRP probes for LacZ#2      | CAAGGCGATTAAAGTTGGGTA  |
| CHIRP probes for LacZ#3      | TGCGTAAGGAGAAAATACCG   |

---

---

|                          |                                                                                                                                        |
|--------------------------|----------------------------------------------------------------------------------------------------------------------------------------|
| RAP probes for SMARCA1#1 | CTCTTCCTCACCTCTCTTTCTTCATGCGGGGTT<br>TGTCCATCCAGTCGACAATACTCATAACCACG<br>CCACATGCAATAATCTTCCAAAATA<br>ACCAGAAATATGCCACAGGAAGTGGGGTCTTG |
| RAP probes for SMARCA1#2 | TCCTGTACACAGTTTGAAGTGCAGTGGCACA<br>ATCACATCTCACTGCAGCCTCAAAGT<br>GCAAATTGGCATGTCTACATGGTCCCAGTGTG                                      |
| RAP probes for SMARCA1#3 | AGTGGTGTGTGTGCGAGCATGCCCTGTGATGG<br>AATGGCATTCTGTCCAGGGCTAGTTC<br>CTGTGTGCTTGCTGTGAACACTATGCTATGCTA                                    |
| RAP probes for SMARCA1#4 | GAAACAGGCTTCAATAAGGAGGCACACAAGG<br>AACGGAGTGCCCATTCAGCTACAGA<br>GGTAACTACCACCGTCACAGTCAGCAGAGCAG                                       |
| RAP probes for SMARCA1#5 | GTAAAGGGGGCAGTATAGAAAGCAGCGTGGT<br>GTAGTGAGAGGCACCTTGCGTAGAGG<br>CTTGTAGATCAACCTGTGGGTTCAGTCTGAA                                       |
| RAP probes for SMARCA1#6 | TCATATAGTATAACCACATCAGCACTTGCCAG<br>GTTAATTCCGAGACCTCCAGCCCTGG                                                                         |

---

**Supplementary Table 4.** gRNA sequences used in this study

| No.    | Target gene     | Target sequence (5'-3') |
|--------|-----------------|-------------------------|
| gRNA#1 | <i>MIR99AHG</i> | TCCATACCCTAATTGGCCGA    |
| gRNA#2 | <i>MIR99AHG</i> | GACTTGTCGCACGGATGCAG    |
| gRNA#3 | <i>MIR99AHG</i> | ACTTTATTGACGTTAGTGGG    |
| gRNA#4 | <i>MIR99AHG</i> | CCATCTATAACGCTTTCTGC    |
| gRNA#5 | <i>SMARCA1</i>  | TACTCGTTCCCGCTCCACG     |
| gRNA#6 | <i>SMARCA1</i>  | ACTCGTTCCCGCTCCACGG     |

**Supplementary Table 5.** Antibodies used in this study

| Antibodies                                                            | Source                    | Catalog #  |
|-----------------------------------------------------------------------|---------------------------|------------|
| Rabbit anti-human TKS5                                                | Cell Signaling Technology | 16619      |
| Rabbit anti-human SH3PXD2A (TKS5)                                     | Proteintech               | 18976-1-AP |
| Mouse anti-human Cortactin                                            | Abcam                     | Ab33333    |
| Rabbit anti-human p-Cortactin (Tyr421)                                | Cell Signaling Technology | 4569       |
| Rabbit anti-human N-WASP                                              | Cell Signaling Technology | 4848       |
| Rabbit anti-human MMP14                                               | Abcam                     | ab51074    |
| Rabbit anti-human MMP7                                                | Cell Signaling Technology | 3801       |
| Rabbit anti-human TIMP1                                               | Cell Signaling Technology | 8946       |
| Rabbit anti-human TIMP2                                               | Cell Signaling Technology | 5738       |
| Rabbit anti-human GAPDH                                               | Cell Signaling Technology | 2118       |
| Rabbit anti-human $\beta$ -actin                                      | Cell Signaling Technology | 4970       |
| Mouse anti-human E-Cadherin                                           | Cell Signaling Technology | 14472      |
| Rabbit anti-human $\beta$ -catenin                                    | Cell Signaling Technology | 8480       |
| Rabbit anti-human Vimentin                                            | Cell Signaling Technology | 5741       |
| Rabbit anti-human PTBP1                                               | Proteintech               | 12582-1-AP |
| Rabbit anti-human U2AF2                                               | Abcam                     | ab37530    |
| Mouse anti-human Ki-67                                                | Cell Signaling Technology | 9449       |
| Rabbit anti-Flag                                                      | Sigma-Aldrich             | F7425      |
| Rabbit anti-human SAMRCA1                                             | Cell Signaling Technology | 12483      |
| anti-Rabbit HRP-linked IgG                                            | Cell Signaling Technology | 7074       |
| anti-Mouse HRP-linked IgG                                             | Cell Signaling Technology | 7076       |
| Goat anti-Rabbit IgG (H+L) Highly Cross-Adsorbed, Alexa Fluor 488     | Thermo Fisher Scientific  | A-11034    |
| Goat anti-Mouse IgG (H+L) Highly Cross-Adsorbed, Alexa Fluor Plus 594 | Thermo Fisher Scientific  | A32742     |
| Rabbit IgG                                                            | Proteintech               | B900610    |
